# Supplementary material for: A laterally-fused N-heterocyclic carbene framework from polysubstituted aminoimidazo[5,1-b]oxazol-6-ium salts
Source: publisher site journal article supplement (doi:10.3762/bjoc.20.54), 2024-03-18
Supplement: Additional file 1 [file 1860-5397-20-54-S1.pdf]

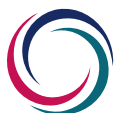

## Supporting Information

for

### **A laterally-fused N-heterocyclic carbene framework from polysubstituted aminoimidazo[5,1-*b*]oxazol-6-ium salts**

Andrew D. Gillie, Matthew G. Wakeling, Bethan L. Greene, Louise Male  
and Paul W. Davies

*Beilstein J. Org. Chem.* **2024**, *20*, 621–627. doi:10.3762/bjoc.20.54

**Experimental procedures and characterisation data, additional cyclisation studies, XRD data and NMR spectra of compounds**

## Table of contents

|                                                            |     |
|------------------------------------------------------------|-----|
| General experimental .....                                 | S1  |
| Starting materials .....                                   | S2  |
| Attempted cyclisation conditions from imine <b>6</b> ..... | S13 |
| Catalysis .....                                            | S14 |
| NMR spectra .....                                          | S16 |
| Crystallographic data .....                                | S34 |
| References .....                                           | S37 |

## General experimental

Commercially available chemicals/reagents were purchased from major suppliers (Sigma-Aldrich, Fisher, Acros, Alfa Aesar, Strem, Fluorochem or VWR) and used without further purification. The solvents used were purified using a Pure Solv-MD solvent purification system and were transferred under argon. Anhydrous DMF, 1,4-dioxane and *m*-xylene was dried over 4 Å Linde-type molecular sieves. All reactions were stirred using Teflon-coated magnetic stirrer bars. Asynt DrySyn heating blocks on stirrer hotplates were employed for reactions with temperature controlled via external probe. Reactions were monitored using Merck silica gel 60 F254 TLC plates which were developed using standard visualizing agent: UV fluorescence (254 nm), potassium permanganate /Δ and vanillin /Δ UV. Manual flash column chromatography was carried out on Sigma-Aldrich silica gel (pore size 60 Å, 230–400 mesh particle size); automated flash column chromatography was carried using a Teledyne Isco Combiflash NextGen 100 instrument, using either Teledyne Isco Redisep RediSep® Normal-phase, RediSep Rf Gold® Normal-Phase, or InterChim Puriflash IR Silica flash columns. Melting points were measured in open capillary tubes using a Stuart Scientific melting point apparatus and are uncorrected. Infrared spectra were recorded using a Perkin-Elmer spectrum 100 FTIR spectrometer using an ATR attachment; selected absorbencies ( $\nu_{\max}$ ) are reported. Mass spectra were obtained using Waters GCT Premier (EI), Waters LCT (ES) or Waters Synapt (ES). Both the calculated and measured values are reported as neutrals within Waters MassLynx (V4.1 used). High-resolution spectra used a lock-mass to adjust the calibrated mass scale. NMR spectra were recorded using Bruker AV300 or AVIII300 ( $^1\text{H} = 300 \text{ MHz}$ ,  $^{19}\text{F} = 282 \text{ MHz}$ ,  $^{31}\text{P} = 121 \text{ MHz}$ ) and Bruker AV400 or AVIII400 ( $^1\text{H} = 400 \text{ MHz}$ ,  $^{13}\text{C} = 101 \text{ MHz}$ ) spectrometers in commercial solvents at ambient temperature. Chemical shifts ( $\delta$ ) are given in ppm relative to TMS and are calibrated using residual solvent peaks ( $\text{CDCl}_3$ :  $\delta_{\text{C}} = 77.16 \text{ ppm}$ , acetone-*d*<sub>6</sub>:  $\delta_{\text{C}} = 206.26 \text{ ppm}$ ; residual  $\text{CHCl}_3$  in  $\text{CDCl}_3$ :  $\delta_{\text{H}} = 7.26 \text{ ppm}$ , residual acetone in acetone-*d*<sub>6</sub>:  $\delta_{\text{H}} \equiv 2.05 \text{ ppm}$ ). NMR spectra were run in TMS-free  $\text{CDCl}_3$ , TMS-containing  $\text{CDCl}_3$  and acetone-*d*<sub>6</sub>. Multiplicity of resonances in  $^1\text{H}$  NMR spectra were denoted as follows: s (singlet), d (doublet), t (triplet), m (multiplet), *app.* (apparent). Coupling constants (*J*) are quoted to one decimal place. Proton decoupled  $^{13}\text{C}$  NMR spectra were recorded using the UDEFT or PENDANT pulse sequences from the Bruker standard pulse program library.  $^{13}\text{C}$  DEPT spectra and 2D COSY, HSQC and HMBC spectra were recorded to assist with NMR assignment when necessary. NMR spectra were processed using MestreNova software.

## Starting materials

### ***N*-Methylmethanesulfonamide (S1)**

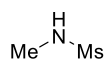

Following a literature procedure[1], MeNH<sub>2</sub> (33% in EtOH, 65 mL, 527 mmol) was added to a flask fitted with a reflux condenser and MsCl (9 mL, 116 mmol) was added over 15 minutes whilst cooling with an ice/water bath. The reaction mixture was stirred for 18 h at room temperature before CH<sub>2</sub>Cl<sub>2</sub> (150 mL) was added to precipitate MeNH<sub>3</sub>Cl, which was removed by filtration through a 5 cm pad of silica. The filtrate was concentrated under reduced pressure and purified by flash column chromatography (3:2 EtOAc:hexane) to give *sulfonamide* as a colourless oil (8.34 g, 66%) (*note that this product is water soluble*); IR (neat):  $\nu = 3290, 1405, 1301, 1146, 1126, 1067, 969, 834, 751 \text{ cm}^{-1}$ ; <sup>1</sup>H-NMR (300 MHz, CDCl<sub>3</sub>):  $\delta = 4.32$  (br s, NH), 2.95 (s, 3H), 2.83 (d,  $J = 5.3 \text{ Hz}$ , 3H); <sup>13</sup>C-NMR (101 MHz, CDCl<sub>3</sub>):  $\delta = 38.8$  (CH<sub>3</sub>), 29.5 (CH<sub>3</sub>). Spectroscopic data matched those reported[1].

### **1-(2,2-Dibromovinyl)-4-methoxybenzene (S2)**

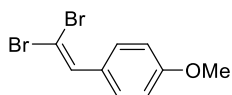

CBr<sub>4</sub> (2.63 g, 7.9 mmol) and PPh<sub>3</sub> (4.23 g, 16.0 mmol) were dissolved in CH<sub>2</sub>Cl<sub>2</sub> (0.13 M with respect to aldehyde) under an argon atmosphere whilst cooling with an ice/water bath. The reaction mixture was stirred for 1 hour, after which 4-anisaldehyde (490  $\mu$ L, 4.0 mmol) was added and stirring was continued for a further 18 h at room temperature. Satd. NaHCO<sub>3(aq)</sub> solution and additional CH<sub>2</sub>Cl<sub>2</sub> were added until all solids were dissolved and the phases were separated. The organic phase was dried over Na<sub>2</sub>SO<sub>4</sub>, concentrated under reduced pressure. Filtration of the residue through a 5 cm pad of silica (eluting with hexane) afforded the *dibromoalkene* **S2** as a pale yellow solid (1.14 g, 97%); mp: 33-34 °C (lit.[2] 37-38 °C); IR (neat):  $\nu = 2964, 2840, 1603, 1567, 1507, 1254, 1177, 1026, 863 \text{ cm}^{-1}$ ; <sup>1</sup>H-NMR (300 MHz, CDCl<sub>3</sub>):  $\delta = 7.51$  (d,  $J = 8.8 \text{ Hz}$ , 2H), 7.41 (s, 1H), 6.89 (d,  $J = 8.8 \text{ Hz}$ , 2H), 3.82 (s, 3H); <sup>13</sup>C-NMR (101 MHz, CDCl<sub>3</sub>):  $\delta = 159.8$  (C), 136.5 (CH), 130.0 (2CH), 128.0 (C), 113.9 (2CH), 87.4 (C), 55.4 (CH<sub>3</sub>). Spectroscopic data matched those reported[3].

### ***N*-Methyl-*N*-(phenylethynyl)methanesulfonamide (1a)**

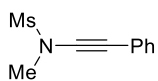

Following a literature procedure [4], a two-necked flask under an argon atmosphere was charged with sulfonamide **S1** (811 mg, 7.4 mmol), K<sub>2</sub>CO<sub>3</sub> (2.07 g, 15 mmol), CuSO<sub>4</sub>·5H<sub>2</sub>O (187 mg, 0.75 mmol), 1,10-phenanthroline (270 mg, 1.5 mmol), (bromoethynyl)benzene (1.63 g, 9.0 mmol) and toluene (1 M with respect to amide). The reaction mixture was heated at 70 °C for 18 h. After cooling to room temperature,

the reaction mixture was filtered through a 5 cm pad of silica gel, concentrated under reduced pressure, and then purified by flash column chromatography (10→30% EtOAc in hexane) gave *ynamide* **1a** as a pale yellow solid (1.51 g, 97%); mp: 54-55 °C (lit. [5] 61-63 °C); IR (neat):  $\nu = 2241, 1347, 1320, 1155, 1107, 957, 763 \text{ cm}^{-1}$ ;  $^1\text{H-NMR}$  (300 MHz,  $\text{CDCl}_3$ ):  $\delta = 7.46\text{-}7.37$  (m, 2H), 7.36-7.27 (m, 3H), 3.30 (s, 3H), 3.13 (s, 3H);  $^{13}\text{C-NMR}$  (101 MHz,  $\text{CDCl}_3$ ):  $\delta = 131.7$  (2CH), 128.5 (2CH), 128.2 (CH), 122.5 (C), 83.2 (C), 69.6 (C), 39.3 ( $\text{CH}_3$ ), 36.9 ( $\text{CH}_3$ ). Spectroscopic data matched those reported [6].

### ***N*-((4-Methoxyphenyl)ethynyl)-*N*-methylmethanesulfonamide (**1b**)**

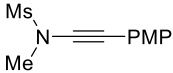
 Following a literature procedure [7], a flask under an argon atmosphere was charged with sulfonamide **S1** (218 mg, 2.0 mmol),  $\text{Cs}_2\text{CO}_3$  (2.60 g, 8.0 mmol),  $\text{CuI}$  (48 mg, 0.25 mmol), dibromoalkene **S2** (870 mg, 3.0 mmol) and DMEDA (40  $\mu\text{L}$ , 0.37 mmol) and the reaction mixture was heated at 70 °C for 36 h. After cooling to room temperature, the reaction mixture was filtered through a 5 cm pad of silica gel (eluting with  $\text{CH}_2\text{Cl}_2$ ), concentrated under reduced pressure and purified by flash column chromatography (20→30% EtOAc in hexane) yielded *ynamide* **1b** as a white solid (455 mg, 92%); mp: 91-92 °C; IR (neat):  $\nu = 3015, 2935, 2236, 1603, 1512, 1353, 1326, 1246, 1158, 1024, 959, 839 \text{ cm}^{-1}$ ;  $^1\text{H-NMR}$  (300 MHz,  $\text{CDCl}_3$ ):  $\delta = 7.36$  (d,  $J = 8.9 \text{ Hz}$ , 2H), 6.83 (d,  $J = 8.9 \text{ Hz}$ , 2H), 3.81 (s, 3H), 3.28 (s, 3H), 3.11 (s, 3H);  $^{13}\text{C-NMR}$  (101 MHz,  $\text{CDCl}_3$ ):  $\delta = 159.8$  (C), 133.7 (2CH), 114.4 (C), 114.1 (2CH), 81.8 (C), 69.3 (C), 55.4 ( $\text{CH}_3$ ), 39.4 ( $\text{CH}_3$ ), 36.7 ( $\text{CH}_3$ ). Spectroscopic data matched those reported [5].

### **Methyl (2,6-diisopropylphenyl)glycinate (**11**)**

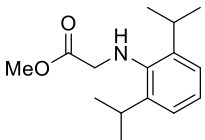
 Adapted from a literature procedure[8], methyl bromoacetate (950  $\mu\text{L}$ , 10 mmol) was added to a mixture of 2,6-diisopropylaniline (1.9 mL, 10 mmol) and  $\text{NaOAc}$  (821 mg, 10 mmol) in methanol (1.5 mL) and the reaction mixture was heated at 55 °C for 6 h. After cooling to room temperature, the reaction mixture was filtered through cotton, concentrated under reduced pressure and purified by flash column chromatography (3:17  $\text{Et}_2\text{O}$ :hexane) to give *ester* **11** as a red oil (2.20 g, 88%); IR (neat):  $\nu = 2961, 2870, 1742, 1621, 1438, 1344, 1214 \text{ cm}^{-1}$ ;  $^1\text{H-NMR}$  (300 MHz,  $\text{CDCl}_3$ ):  $\delta = 7.13\text{-}7.06$  (m, 3H), 3.79 (s, 3H), 3.74 (s, 2H), 3.28 (hept,  $J = 6.8 \text{ Hz}$ , 2H), 1.25 (d,  $J = 6.8 \text{ Hz}$ , 12H);  $^{13}\text{C-NMR}$  (101 MHz,  $\text{CDCl}_3$ ):  $\delta = 172.5$  (C), 142.6 (C), 142.2 (2C), 124.1 (CH), 123.8 (2CH), 52.4 ( $\text{CH}_2$ ), 52.3 ( $\text{CH}_3$ ), 28.0 (2CH), 24.3 (4 $\text{CH}_3$ ); HRMS (EI):  $m/z$ : calculated for  $\text{C}_{15}\text{H}_{23}\text{NO}_2$ : 249.1729, found 249.1727 (M).

## Methyl *N*-(2,6-diisopropylphenyl)-*N*-formylglycinate (**12**)

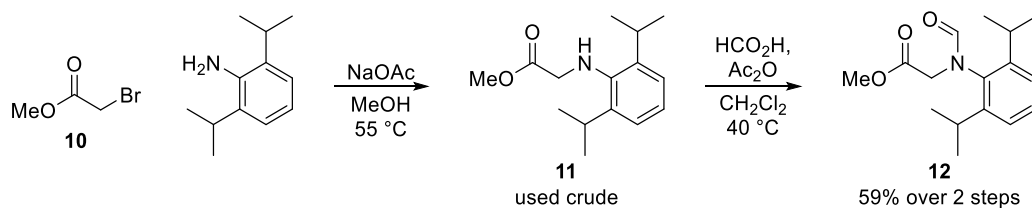

Methyl bromoacetate (2.8 mL, 30.0 mmol) was added to a mixture of 2,6-diisopropylaniline (5.7 mL, 30.0 mmol) and NaOAc (4.92 g, 60.0 mmol) in dry MeOH (4.5 mL) and the reaction mixture was heated at 65 °C for 23 h. After cooling to room temperature, satd. NaHCO<sub>3(aq)</sub> solution (50 mL) was added and the aqueous phase was extracted with CH<sub>2</sub>Cl<sub>2</sub> (3 × 25 mL). The combined organic fractions were washed with brine (50 mL), dried over Na<sub>2</sub>SO<sub>4</sub>, filtered and concentrated under reduced pressure to give the crude ester **11**. Formic acid (4.5 mL, 119 mmol) and Ac<sub>2</sub>O (4.0 mL, 42.4 mmol) were mixed for 1.5 h at room temperature and this mixture was added to a solution of the crude ester **11** in CH<sub>2</sub>Cl<sub>2</sub> (15 mL). The resulting reaction mixture was stirred for 21 h at room temperature and 3 h at 40 °C. After cooling to room temperature, satd. NaHCO<sub>3(aq)</sub> solution (100 mL) was added, the phases were separated and the aqueous phase was extracted with CH<sub>2</sub>Cl<sub>2</sub> (3 × 40 mL). The combined organic phases were dried over Na<sub>2</sub>SO<sub>4</sub>, concentrated under reduced pressure and purified by flash column chromatography (85:15 hexane:EtOAc) to give ester **12** as a white solid (4.90 g, 59% over two steps); mp: 70-72 °C; IR (neat):  $\nu = 2964, 2869, 1763, 1666, 1459, 1329, 1204 \text{ cm}^{-1}$ ; <sup>1</sup>H-NMR (300 MHz, CDCl<sub>3</sub>):  $\delta = 8.13 \text{ (s, 1H)}, 7.42\text{-}7.33 \text{ (m, 1H)}, 7.25\text{-}7.17 \text{ (m, 2H)}, 4.21 \text{ (s, 2H)}, 3.76 \text{ (s, 3H)}, 3.23 \text{ (hept, } J = 6.8 \text{ Hz, 2H)}, 1.21 \text{ (d, } J = 6.8 \text{ Hz, 6H)}, 1.17 \text{ (d, } J = 6.8 \text{ Hz, 6H)}$ ; <sup>13</sup>C-NMR (101 MHz, CDCl<sub>3</sub>):  $\delta = 168.2 \text{ (C)}, 163.7 \text{ (CH)}, 148.0 \text{ (2C)}, 135.7 \text{ (C)}, 129.8 \text{ (CH)}, 124.7 \text{ (2CH)}, 52.4 \text{ (CH}_3\text{)}, 49.9 \text{ (CH}_2\text{)}, 28.2 \text{ (2CH)}, 25.0 \text{ (2CH}_3\text{)}, 24.2 \text{ (2CH}_3\text{)}$ ; HRMS (ES):  $m/z$ : calculated for C<sub>16</sub>H<sub>23</sub>NO<sub>3</sub>Na: 300.1576, found 300.1578 (M+Na).

## Methyl 2,2-dimethoxyacetate (**S3**)

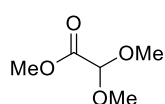

Following a literature procedure [9], TsOH·H<sub>2</sub>O (400 mg, 2.1 mmol) was added to a solution of glyoxylic acid monohydrate (2.00 g, 22 mmol) in trimethyl orthoformate (12 mL, 109 mmol) and the mixture was stirred for 3 h at room temperature. K<sub>2</sub>CO<sub>3</sub> (400 mg, 2.9 mmol) was added and stirring was continued for 0.5 h before isolation of the product by distillation directly from the reaction flask (b.p. 63-64 °C at 25-28 mbar [lit. [9] 64-67 °C at 27 mbar], note that a solvent-containing fraction was collected at 25-28 mbar at room temperature prior to collection of the product fraction) to give ester **S3** as a clear oil

(2.07 g, 71%); IR (neat)  $\nu = 3005, 2955, 2839, 1750, 1440, 1226, 1195, 1116, 1065, 1017, 981, 913, 800 \text{ cm}^{-1}$ ;  $^1\text{H-NMR}$  (300 MHz,  $\text{CDCl}_3$ )  $\delta = 4.83$  (s, 1H), 3.81 (s, 3H), 3.42 (s, 6H);  $^{13}\text{C-NMR}$  (101 MHz,  $\text{CDCl}_3$ )  $\delta = 167.7$  (C), 99.0 (CH), 54.1 (2 $\text{CH}_3$ ), 52.6 (CH<sub>3</sub>). Spectroscopic data match those reported [9].

### General procedure 1 (GP1): synthesis of pyridine-*N*-aminides from esters

*N*-Aminopyridinium iodide (1.0 equiv) and  $\text{K}_2\text{CO}_3$  (2.4 equiv) were suspended in MeOH (0.13 M with respect to *N*-aminopyridinium iodide) and the methyl ester (1.2 equiv) was added. The reaction mixture was stirred for 3 days at room temperature at which point the MeOH was removed under reduced pressure and the residue was suspended in 9:1  $\text{CH}_2\text{Cl}_2/\text{MeOH}$  and filtered through a 5 cm pad of basic alumina. The filtrate was concentrated under reduced pressure and, where necessary, purified by flash column chromatography or recrystallisation.

### ((2,6-Diisopropylphenyl)glycyl)(pyridin-1-ium-1-yl)amide (2)

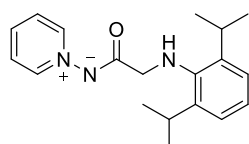

Following **GP1** using *N*-aminopyridinium iodide (1.00 g, 4.5 mmol),  $\text{K}_2\text{CO}_3$  (1.48 g, 10.7 mmol) and ester **12** (1.35 g, 5.4 mmol). Purification by flash column chromatography (0→10% MeOH in  $\text{CH}_2\text{Cl}_2$ ) afforded ylide **2** as red oil (983 mg, 70%); IR (neat):  $\nu = 3360, 2960, 2867, 1577, 1467, 1339, 1269, 1090, 757 \text{ cm}^{-1}$ ;  $^1\text{H-NMR}$  (300 MHz,  $\text{CDCl}_3$ ):  $\delta = 8.78$ -8.70 (m, 2H), 8.03-7.90 (m 1H), 7.76-7.64 (m, 2H), 7.15-7.01 (m, 3H), 3.79 (s, 2H), 3.46 (hept,  $J = 6.8 \text{ Hz}$ , 2H), 1.28 (d,  $J = 6.8 \text{ Hz}$ , 12H);  $^{13}\text{C-NMR}$  (101 MHz,  $\text{CDCl}_3$ ):  $\delta = 174.0$  (C), 144.0 (C), 143.3 (2CH), 142.1 (2C), 137.5 (CH), 126.3 (2CH), 123.7 (2CH), 123.4 (CH), 54.5 (CH<sub>2</sub>), 27.9 (2CH), 24.4 (4CH<sub>3</sub>); HRMS (ES):  $m/z$  calculated for  $\text{C}_{19}\text{H}_{25}\text{N}_3\text{ONa}$ : 334.1895, found 334.1909 (M+Na).

### *N*-(2,6-Diisopropylphenyl)-*N*-formylglycyl(pyridin-1-ium-1-yl)amide (7)

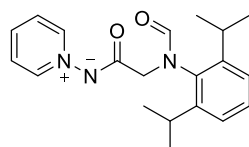

Following **GP1** using *N*-aminopyridinium iodide (1.33 g, 6.00 mmol),  $\text{K}_2\text{CO}_3$  (1.82 g, 6.60 mmol) and ester **11** (1.83 g, 6.60 mmol). Purification by flash column chromatography (94:6  $\text{CH}_2\text{Cl}_2/\text{MeOH}$ ) afforded ylide **7** as brown solid (1.56 g, 77%); mp: 170-172 °C; IR (neat):  $\nu = 2963, 2927, 2869, 1670, 1590, 1469, 1349, 1259, 1192 \text{ cm}^{-1}$ ; NMR shows a mixture of two rotamers in a ~ 0.3:0.7 ratio:  $^1\text{H-NMR}$  (300 MHz,  $\text{CDCl}_3$ ):  $\delta = 8.71$ -8.62 (m, 2H), 8.68 and 8.17 (s, 1H), 7.93 and 7.87 (tt,  $J = 7.7, 1.2 \text{ Hz}$ , 1H), 7.70-7.57 (m, 2H), 7.37-7.26 (m, 1H), 7.23-7.15 (m, 2H), 4.25 and 4.13 (s, 2H), 3.47 and 3.17 (hept,  $J = 6.8 \text{ Hz}$ , 2H), 1.28-1.08 (m, 12H);  $^{13}\text{C-NMR}$  (101 MHz,  $\text{CDCl}_3$ ):  $\delta = 171.6$  and 171.2 (C), 164.7 and 163.8 (CH), 148.2 and 146.6 (2C),

143.0 and 142.7 (2CH), 137.8 and 137.1 (CH), 136.9 and 136.1 (C), 129.3 and 128.8 (CH), 126.4 and 126.2 (2CH), 124.4 and 124.2 (2CH), 54.8 and 52.8 (CH<sub>2</sub>), 28.6 and 28.0 (2CH), 25.1 and 24.6 (2CH<sub>3</sub>), 24.4 and 24.2 (2CH<sub>3</sub>); HRMS (ES): *m/z* calculated for C<sub>20</sub>H<sub>25</sub>N<sub>3</sub>O<sub>2</sub>Na: 362.1844, found 362.1832 (M+Na).

#### (2,2-Dimethoxyacetyl)(pyridin-1-ium-1-yl)amide (4)

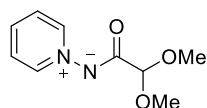

Following **GP1** using *N*-aminopyridinium iodide (666 mg, 3.0 mmol), K<sub>2</sub>CO<sub>3</sub> (995 mg, 7.2 mmol) and ester **S3** (486 mg, 3.6 mmol). Purification by flash column chromatography (100:0:1→90:10:1 CH<sub>2</sub>Cl<sub>2</sub>:MeOH:NEt<sub>3</sub>) yielded ylide **4** as a white powder (496 mg, 84%); mp: 90-92 °C; IR (neat):  $\nu$  = 3110, 3086, 2968, 2926, 2832, 1617, 1600, 1568, 1467, 1399, 1339, 1268, 1198, 1151, 1106, 1044, 983, 900, 851, 779, 749 cm<sup>-1</sup>; <sup>1</sup>H-NMR (300 MHz, CDCl<sub>3</sub>):  $\delta$  = 8.62-8.57 (m, 2H), 7.86 (tt, *J* = 7.7, 1.1 Hz, 1H), 7.64-7.55 (m, 2H), 4.76 (s, 1H), 3.39 (s, 6H); <sup>13</sup>C-NMR (101 MHz, CDCl<sub>3</sub>):  $\delta$  = 170.7 (C), 142.9 (2CH), 137.6 (CH), 126.1 (2CH), 102.0 (CH), 53.7 (2CH<sub>3</sub>); HRMS (ES): *m/z* calculated. for C<sub>9</sub>H<sub>13</sub>N<sub>2</sub>O<sub>3</sub>: 197.0926, found 197.0929 (M+H).

#### General procedure 2 (GP2): gold-catalysed oxazole synthesis

Pyridinium ylide (1.2–1.5 equiv), dichloro(2-pyridinecarboxylato)gold (1–5 mol %), and ynamide (1.0 equiv) were added to a flask under an argon atmosphere. Toluene (0.1 M with respect to ynamide) was added (where ynamides were oils these were added as a solution in toluene) and the reaction mixture was heated at 90 °C for the indicated time. After cooling to room temperature, the reaction mixture was filtered through a 5 cm plug of silica gel (washing with CH<sub>2</sub>Cl<sub>2</sub> and then EtOAc) and the filtrate was concentrated under reduced pressure and purified by flash column chromatography.

#### *N*-(2-(((2,6-Diisopropylphenyl)amino)methyl)-5-phenyloxazol-4-yl)-*N*-methylmethanesulfonamide (3)

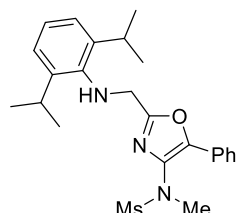

Following **GP2** using ylide **2** (402 mg, 1.3 mmol), ynamide **1a** (180 mg, 0.86 mmol) and gold catalyst (6.7 mg, 2 mol%) for 17 h. Purification by flash column chromatography (15→20% EtOAc in hexane) yielded oxazole **3** as a white solid (266 mg, 70%); mp: 160-162 °C; IR (neat):  $\nu$  = 2966, 1452, 1364, 1342, 1069, 969 cm<sup>-1</sup>; <sup>1</sup>H-NMR (300 MHz, CDCl<sub>3</sub>):  $\delta$  = 7.93-7.83 (m, 2H), 7.50-7.33 (m, 3H), 7.17-7.07 (m, 3H), 4.24 (s, 2H), 3.36 (hept, *J* = 6.8 Hz, 2H), 3.27 (s, 3H), 3.11 (s, 3H), 1.27 (d, *J* = 6.8 Hz, 12H); <sup>13</sup>C-NMR (101 MHz, CDCl<sub>3</sub>):  $\delta$  = 159.7 (C), 146.0 (C),



142.8 (2C), 141.6 (C), 133.2 (C), 129.2 (CH), 128.9 (2CH), 126.7 (C), 125.4 (2CH), 124.8 (CH), 123.9 (2CH), 48.2 (CH<sub>2</sub>), 38.0 (CH<sub>3</sub>), 36.9 (CH<sub>3</sub>), 27.9 (2CH), 24.3 (4CH<sub>3</sub>); HRMS (ES): *m/z* calculated for C<sub>24</sub>H<sub>31</sub>N<sub>3</sub>O<sub>3</sub>SNa: 464.1984, found 464.1995 (M+Na).

### ***N*-(2-(Dimethoxymethyl)-5-phenyloxazol-4-yl)-*N*-methylmethanesulfonamide (5)**

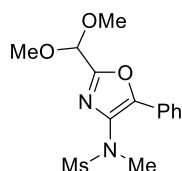

*Note: To avoid degradation, room temperature water baths should be used when evaporating solvent from this compound.*

Following **GP2** with ylide **4** (295 mg, 1.5 mmol), ynamide **1a** (209 mg, 1.0 mmol) and gold catalyst (8.2 mg, 2 mol%) for 2.5 h. Purification by flash column chromatography (80:20:1→50:50:1 hexane:EtOAc:NEt<sub>3</sub>) yielded oxazole **5** as a white solid (296 mg, 91%); mp: 108-110 °C; IR (neat):  $\nu = 3016, 2956, 2909, 2833, 1451, 1358, 1337, 1324, 1152, 1116, 1059, 961, 841, 763 \text{ cm}^{-1}$ ; <sup>1</sup>H-NMR (300 MHz, CDCl<sub>3</sub>):  $\delta = 7.98\text{-}7.93$  (m, 2H), 7.48-7.41 (m, 2H), 7.41-7.34 (m, 1H), 5.50 (s, 1H), 3.49 (s, 6H), 3.29 (s, 3H), 3.14 (s, 3H); <sup>13</sup>C-NMR (101 MHz, CDCl<sub>3</sub>):  $\delta = 156.4$  (C), 146.5 (C), 133.2 (C), 129.5 (CH), 128.9 (2CH), 126.5 (C), 125.7 (2CH), 97.0 (CH), 53.9 (2CH<sub>3</sub>), 38.0 (CH<sub>3</sub>), 37.2 (CH<sub>3</sub>); HRMS (ES): *m/z* calculated for C<sub>14</sub>H<sub>18</sub>N<sub>2</sub>O<sub>5</sub>SNa: 349.0834, found 349.0840 (M+Na).

### ***E*)-*N*-(2-(((2,6-Diisopropylphenyl)imino)methyl)-5-phenyloxazol-4-yl)-*N*-methylmethanesulfonamide (6)**

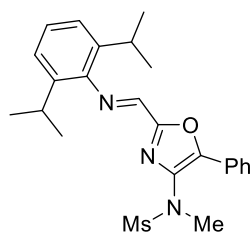

Trifluoroacetic acid (3.75 mL, 49 mmol) was added to a solution of oxazole **5** (248 mg, 0.76 mmol) and diisopropylaniline (160  $\mu$ L, 0.85 mmol) in toluene (7.5 mL). The reaction mixture was stirred for 14 h at room temperature before cooling in an ice/water bath whilst NEt<sub>3</sub> (7.5 mL, 54 mmol) was added over 10 minutes resulting in a colour change from red to yellow. The solvent was removed under reduced pressure and the crude product was purified by flash column chromatography (80:20:1 hexane:EtOAc:NEt<sub>3</sub>) to give oxazole **6** as a yellow solid (331 mg, 99%); mp: 198-202 °C; IR (neat):  $\nu = 2967, 1618, 1451, 1345, 1154, 970 \text{ cm}^{-1}$ ; <sup>1</sup>H-NMR (400 MHz, CDCl<sub>3</sub>):  $\delta = 8.14\text{-}8.08$  (m, 2H), 8.02 (s, 1H), 7.53-7.40 (m, 3H), 7.22-7.14 (m, 3H), 3.37 (s, 3H), 3.21 (s, 3H), 2.97 (hept, *J* = 6.9 Hz, 2H), 1.21 (d, *J* = 6.9 Hz, 12H); <sup>13</sup>C-NMR (101 MHz, CDCl<sub>3</sub>):  $\delta = 155.0$  (C), 148.6 (CH), 148.2 (C), 147.8 (C), 137.4 (2C), 135.4 (C), 130.3 (CH), 129.1 (2CH), 126.3 (2CH), 126.1 (C), 125.4 (CH), 123.4 (2CH), 38.1 (CH<sub>3</sub>), 37.2 (CH<sub>3</sub>), 28.1 (2CH), 23.8 (4CH<sub>3</sub>); HRMS (ES): *m/z* calculated for C<sub>24</sub>H<sub>30</sub>N<sub>3</sub>O<sub>3</sub>S: 440.2008, found 440.1997 (M+H).

***N*-(2,6-Diisopropylphenyl)-*N*-((4-(*N*-methylmethylsulfonamido)-5-phenyloxazol-2-yl)methyl)formamide (**8a**)**

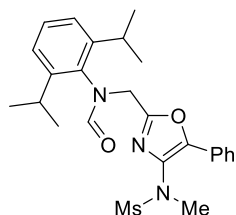

Following **GP2** using ylide **7** (611 mg, 1.8 mmol), ynamide **1a** (314 mg, 1.5 mmol) and gold catalyst (12 mg, 2 mol%) for 4 h. Purification by flash column chromatography (25→50% EtOAc in hexane) yielded oxazole **8a** as a white solid (549 mg, 78%); mp: 193-195 °C; IR (neat):  $\nu = 2971, 2855, 1675, 1495, 1348, 1153 \text{ cm}^{-1}$ ; NMR shows a mixture of two rotamers in a  $\sim 0.2:0.8$  ratio:  $^1\text{H-NMR}$  (300 MHz,  $\text{CDCl}_3$ ):  $\delta = 8.75$  and  $8.19$  (s, 1H),  $7.88$ - $7.80$  (m, 2H),  $7.48$ - $7.31$  (m, 4H),  $7.20$  (d,  $J = 7.7 \text{ Hz}$ , 2H),  $4.90$  and  $4.75$  (s, 2H),  $3.20$  and  $3.19$  (s, 3H),  $3.06$  and  $2.98$  (s, 3H),  $2.96$  and  $2.81$  (hept,  $J = 6.9 \text{ Hz}$ , 2H),  $1.18$ - $1.03$  (m, 12H);  $^{13}\text{C-NMR}$  (101 MHz,  $\text{CDCl}_3$ ): only the peaks for the major rotamer are reported  $\delta = 163.5$  (CH),  $155.9$  (C),  $148.1$  (2C),  $146.8$  (C),  $134.3$  (C),  $133.4$  (C),  $130.1$  (CH),  $129.4$  (CH),  $129.0$  (2CH),  $126.5$  (C),  $125.5$  (2CH),  $124.7$  (2CH),  $43.9$  ( $\text{CH}_2$ ),  $38.0$  ( $\text{CH}_3$ ),  $36.9$  ( $\text{CH}_3$ ),  $28.5$  (2CH),  $25.3$  (2 $\text{CH}_3$ ),  $23.8$  (2 $\text{CH}_3$ ); HRMS (ES):  $m/z$  calculated for  $\text{C}_{25}\text{H}_{31}\text{N}_3\text{O}_4\text{SNa}$ : 492.1933, found 492.1943 (M+Na).

***N*-(2,6-Diisopropylphenyl)-*N*-((5-(4-methoxyphenyl)-4-(*N*-methylmethylsulfonamido)oxazol-2-yl)methyl)formamide (**8b**)**

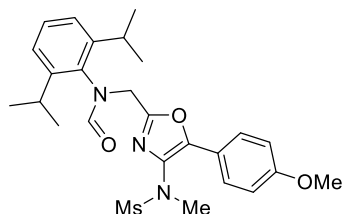

Following **GP2** using ylide **7** (1.84 g, 5.4 mmol), ynamide **1b** (1.08 g, 4.5 mmol) and gold catalyst (35 mg, 2 mol%) for 4 h. Purification by flash column chromatography (30→50% EtOAc in hexane) yielded oxazole **8b** as a white solid (1.64 g, 73%); mp: 148-151 °C; IR (neat):  $\nu = 2969, 1686, 1509, 1345, 1177, 1151, 837 \text{ cm}^{-1}$ ; NMR shows a mixture of two rotamers in a  $\sim 0.3:0.7$  ratio:  $^1\text{H-NMR}$  (300 MHz,  $\text{CDCl}_3$ ):  $\delta = 8.75$  and  $8.18$  (s, 1H),  $7.82$ - $7.75$  (m, 2H),  $7.41$ - $7.31$  (m, 1H),  $7.20$  (d,  $J = 7.7 \text{ Hz}$ , 2H),  $6.99$ - $6.90$  (m, 2H),  $4.89$  and  $4.73$  (s, 2H),  $3.85$  and  $3.84$  (s, 3H),  $3.18$  and  $3.16$  (s, 3H),  $3.04$  and  $2.96$  (s, 3H),  $2.95$  and  $2.81$  (hept,  $J = 6.9 \text{ Hz}$ , 2H),  $1.19$ - $1.02$  (m, 12H);  $^{13}\text{C-NMR}$  (101 MHz,  $\text{CDCl}_3$ ): only the peaks for the major rotamer are reported  $\delta = 163.3$  (CH),  $160.4$  (C),  $155.0$  (C),  $148.0$  (2C),  $146.9$  (C),  $134.2$  (C),  $131.8$  (C),  $130.0$  (CH),  $127.1$  (2CH),  $124.6$  (2CH),  $119.2$  (C),  $114.3$  (2CH),  $55.4$  ( $\text{CH}_3$ ),  $43.7$  ( $\text{CH}_2$ ),  $37.9$  ( $\text{CH}_3$ ),  $36.7$  ( $\text{CH}_3$ ),  $28.4$  (2CH),  $25.3$  (2 $\text{CH}_3$ ),  $23.6$  (2 $\text{CH}_3$ ); HRMS (ES):  $m/z$  calculated for  $\text{C}_{26}\text{H}_{34}\text{N}_3\text{O}_5\text{S}$ : 500.2219, found 500.2215 (M+H).

### General procedure 3 (GP3): Synthesis of AImOx·HPF<sub>6</sub> salts

Adapted from a literature procedure[10], under an argon atmosphere POCl<sub>3</sub> (3.0 equiv) was added to a solution of oxazole (1.0 equiv) in *m*-xylene (0.1 M with respect to oxazole) and the reaction mixture was heated at 140 °C for 64 h. After cooling to room temperature, the impure AImOx·HCl salt was isolated by flash column chromatography (0→10% MeOH in CH<sub>2</sub>Cl<sub>2</sub>). The resulting brown solid was taken up in refluxing H<sub>2</sub>O (≈ 10 mL) and the hot solution was filtered through glass wool, the flask was then washed out with additional boiling H<sub>2</sub>O (≈ 5 mL) which was also filtered through the glass wool. The aqueous filtrate was allowed to cool to room temperature and a saturated solution of KPF<sub>6(aq)</sub> (2.0 equiv) was added, leading to instant precipitation of the crude AImOx·HPF<sub>6</sub> salt. The solid was collected by filtration, washed with ice-cold water and Et<sub>2</sub>O, and then recrystallised from acetone by addition of Et<sub>2</sub>O to give the AImOx·HPF<sub>6</sub> salt.

### 6-(2,6-Diisopropylphenyl)-3-(*N*-methylmethylsulfonamido)-2-phenylimidazo[5,1-*b*]oxazol-6-ium hexafluorophosphate(V) (9a)

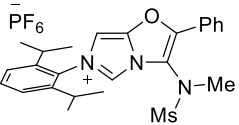 Following **GP3** using oxazole **8a** (827 mg, 1.8 mmol) and POCl<sub>3</sub> (500 μL, 5.4 mmol), purification by flash column chromatography and ion exchange with KPF<sub>6</sub> (644 mg, 3.5 mmol) gave **9a** as a white solid (706 mg, 67%); mp: 236-238 °C; IR (neat): ν = 3148, 2967, 1622, 1346, 1236, 1156, 1061, 830 cm<sup>-1</sup>; <sup>1</sup>H-NMR (400 MHz, d<sub>6</sub>-acetone): δ = 9.77 (d, *J* = 1.6 Hz, 1H), 8.11-8.08 (m, 2H), 8.06 (d, *J* = 1.6 Hz, 1H), 7.72-7.65 (m, 4H), 7.51 (d, *J* = 7.9 Hz, 2H), 3.58 (s, 3H), 3.37 (s, 3H), 2.63 (hept, *J* = 6.8 Hz, 2H), 1.22 (d, *J* = 6.8 Hz, 6H), 1.20 (d, *J* = 6.8 Hz, 6H); <sup>13</sup>C-NMR (101 MHz, d<sub>6</sub>-acetone): δ = 152.4 (C), 146.9 (2C), 145.7 (C), 133.08 (CH), 133.05 (CH), 132.6 (C), 130.6 (2CH), 127.7 (2CH), 125.7 (C), 125.6 (2CH), 121.8 (CH), 119.2 (C), 101.4 (CH), 40.1 (CH<sub>3</sub>), 37.1 (CH<sub>3</sub>), 29.2 (2CH), 24.7 (2CH<sub>3</sub>), 24.3 (2CH<sub>3</sub>); <sup>19</sup>F{<sup>1</sup>H}-NMR (282 MHz, d<sub>6</sub>-acetone): δ = -72.6 (d, *J*<sub>F-P</sub> = 708 Hz); <sup>31</sup>P{<sup>1</sup>H}-NMR (121 MHz, d<sub>6</sub>-acetone): δ = -145.2 (hept, *J*<sub>F-P</sub> = 708 Hz); HRMS (ES): *m/z* calculated for C<sub>25</sub>H<sub>30</sub>N<sub>3</sub>O<sub>3</sub>S: 452.2008, found 452.2004 (M-PF<sub>6</sub>); Anal. calculated for C<sub>25</sub>H<sub>30</sub>F<sub>6</sub>N<sub>3</sub>O<sub>3</sub>PS: C, 50.25; H, 5.06; N, 7.03. Found: C, 50.19; H, 4.86; N, 7.10.

### 6-(2,6-Diisopropylphenyl)-2-(4-methoxyphenyl)-3-(*N*-methylmethylsulfonamido)imidazo[5,1-*b*]oxazol-6-ium hexafluorophosphate(V) (9b)

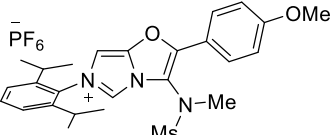 Following **GP3** using oxazole **8b** (343 mg, 0.7 mmol) and POCl<sub>3</sub> (200 μL, 2.1 mmol), purification by flash column chromatography and ion exchange with KPF<sub>6</sub> (254 mg,

1.4 mmol) gave **9b** as a white solid (232 mg, 53%); mp: 146-148 °C; IR (neat):  $\nu = 3148, 2969, 1620, 1608, 1346, 1261, 1178, 1155, 830 \text{ cm}^{-1}$ ;  $^1\text{H-NMR}$  (400 MHz,  $\text{CDCl}_3$ ):  $\delta = 8.51$  (d,  $J = 1.5$  Hz, 1H), 7.84 (d,  $J = 9.0$  Hz, 2H), 7.56 (t,  $J = 7.9$  Hz, 1H), 7.33 (d,  $J = 7.9$  Hz, 2H), 7.09 (d,  $J = 9.0$  Hz, 2H), 7.03 (d,  $J = 1.5$  Hz, 1H), 3.89 (s, 3H), 3.42 (s, 3H), 3.18 (s, 3H), 2.39 (hept,  $J = 6.8$  Hz, 2H), 1.21 (d,  $J = 6.8$  Hz, 6H), 1.18 (d,  $J = 6.8$  Hz, 6H);  $^{13}\text{C-NMR}$  (101 MHz,  $\text{CDCl}_3$ ):  $\delta = 162.9$  (C), 152.5 (C), 146.0 (2C), 143.8 (C), 132.4 (CH), 131.0 (C), 128.9 (2CH), 124.8 (2CH), 119.9 (CH), 116.4 (C), 116.1 (C), 115.4 (2CH), 99.4 (CH), 55.7 (CH<sub>3</sub>), 40.2 (CH<sub>3</sub>), 36.9 (CH<sub>3</sub>), 28.7 (2CH), 24.6 (2CH<sub>3</sub>), 24.2 (2CH<sub>3</sub>);  $^{19}\text{F}\{^1\text{H}\}\text{-NMR}$  (282 MHz,  $\text{CDCl}_3$ ):  $\delta = -72.9$  (d,  $J_{F-P} = 713$  Hz);  $^{31}\text{P}\{^1\text{H}\}\text{-NMR}$  (121 MHz,  $\text{CDCl}_3$ ):  $\delta = -144.6$  (hept,  $J_{F-P} = 713$  Hz); HRMS (ES):  $m/z$  calculated for  $\text{C}_{26}\text{H}_{32}\text{N}_3\text{O}_4\text{S}$ : 482.2114, found 482.2117 (M-PF<sub>6</sub>); Anal. calculated for  $\text{C}_{26}\text{H}_{32}\text{F}_6\text{N}_3\text{O}_4\text{PS}$ : C, 49.76; H, 5.14; N, 6.70. Found: C, 49.81; H, 5.15; N, 6.77.

#### General procedure 4 (GP4): Synthesis of (AImOx)MCl complexes

Adapted from a literature procedure [11], a vial was charged sequentially with AImOx·HPF<sub>6</sub>, the corresponding metal chloride, NEt<sub>3</sub> (70  $\mu\text{L}$ , 0.50 mmol) and acetone (2 mL) and heated at 60 °C for 18 h. The solvent was removed under reduced pressure and the crude mixture was taken up in  $\text{CH}_2\text{Cl}_2$  ( $\approx 10$  mL) and washed with  $\text{H}_2\text{O}$  ( $2 \times 10$  mL). The organic phase was dried over  $\text{Na}_2\text{SO}_4$ , concentrated under reduced pressure and purified by flash column chromatography to give the (AImOx)MCl complex.

#### AImOxAuCl (**13**)

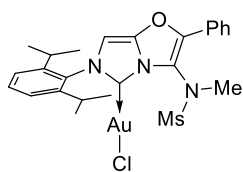

Following **GP4** using **9a** (100 mg, 0.17 mmol) and (DMS)AuCl (59.2 mg, 0.20 mmol). Purification by flash column chromatography (30→50% EtOAc in hexane) gave **13** as a white solid (99.6 mg, 87%); mp: decomp. 230 °C; IR (neat):  $\nu = 3144, 2968, 1621, 1351, 1158, 1055, 965 \text{ cm}^{-1}$ ;  $^1\text{H-NMR}$  (400 MHz,  $\text{CDCl}_3$ ):  $\delta = 8.01$ -7.95 (m, 2H), 7.59-7.49 (m, 4H), 7.28 (d,  $J = 7.8$  Hz, 2H), 6.79 (s, 1H), 3.73 (s, 3H), 3.53 (s, 3H), 2.48-2.31 (m, 2H), 1.34-1.28 (m, 6H), 1.20-1.14 (m, 6H);  $^{13}\text{C-NMR}$  (101 MHz,  $\text{CDCl}_3$ ):  $\delta = 154.6$  (C), 151.0 (C), 145.9 (C), 145.7 (C), 144.5 (C), 135.1 (C), 131.5 (CH), 131.2 (CH), 129.4 (2CH), 126.1 (2CH), 125.4 (C), 124.5 (2CH), 118.0 (C), 97.4 (CH), 43.0 (CH<sub>3</sub>), 37.8 (CH<sub>3</sub>), 28.6 (2CH), 24.7 (2CH<sub>3</sub>), 24.6 (CH<sub>3</sub>), 24.5 (CH<sub>3</sub>); HRMS (ES):  $m/z$  calculated for  $\text{C}_{25}\text{H}_{29}\text{Au}^{35}\text{ClN}_3\text{O}_3\text{SNa}$ : 706.1181, found 706.1204 (M+Na); Anal. calculated for  $\text{C}_{25}\text{H}_{29}\text{AuClN}_3\text{O}_3\text{S}$ : C, 43.90; H, 4.27; N, 6.14. Found: C, 44.10;

H, 4.17; N, 6.15. Crystals suitable for single crystal X-ray diffraction were grown by slow evaporation of a solution of **13** in EtOAc.

### **AlmOxCuCl (14)**

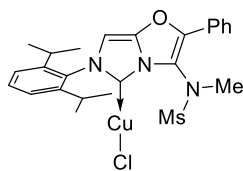

Following **GP4** using **9a** (100 mg, 0.17 mmol) and CuCl (34 mg, 0.34 mmol). Purification by flash column chromatography (30% EtOAc in hexane) gave **14** as a white solid (49.9 mg, 54%); mp: 216-217 °C; IR (neat):  $\nu = 3149, 2962, 2926, 2869, 1620, 1351, 1157, 1057, 1036, 964 \text{ cm}^{-1}$ ;  $^1\text{H-NMR}$  (400 MHz,  $\text{CDCl}_3$ ):  $\delta = 8.01\text{-}7.95$  (m, 2H), 7.58-7.48 (m, 4H), 7.29 (d,  $J = 8.0 \text{ Hz}$ , 2H), 6.76 (s, 1H), 3.73 (s, 3H), 3.48 (s, 3H), 2.44 (hept,  $J = 6.8 \text{ Hz}$ , 1H), 2.35 (hept,  $J = 6.8 \text{ Hz}$ , 1H), 1.29 (d,  $J = 6.8 \text{ Hz}$ , 3H), 1.26 (d,  $J = 6.8 \text{ Hz}$ , 3H), 1.19 (d,  $J = 6.8 \text{ Hz}$ , 3H), 1.17 (d,  $J = 6.8 \text{ Hz}$ , 3H);  $^{13}\text{C-NMR}$  (101 MHz,  $\text{CDCl}_3$ ):  $\delta = 159.2$  (C), 150.5 (C), 145.9 (C), 145.7 (C), 145.1 (C), 135.5 (C), 131.3 (CH), 131.1 (CH), 129.4 (2CH), 126.1 (2CH), 125.6 (C), 124.4 (2CH), 118.1 (C), 97.5 (CH), 43.1 ( $\text{CH}_3$ ), 37.3 ( $\text{CH}_3$ ), 28.6 (2CH), 25.1 ( $\text{CH}_3$ ), 25.0 ( $\text{CH}_3$ ), 24.5 ( $\text{CH}_3$ ), 24.2 ( $\text{CH}_3$ ); Anal. calculated for  $\text{C}_{25}\text{H}_{29}\text{ClCuN}_3\text{O}_3\text{S}$ : C, 54.54; H, 5.31; N, 7.63. Found: C, 54.76; H, 5.32; N, 7.70. Crystals suitable for single crystal X-ray diffraction were grown by diffusion of pentane into a solution of **14** in  $\text{CH}_2\text{Cl}_2/\text{CDCl}_3$ .

### **(9a)Ir(CO)<sub>2</sub>Cl (15a)**

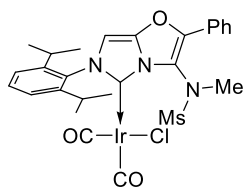

Inside a  $\text{N}_2$  filled glovebox NaOt-Bu (21.0 mg, 0.22 mmol) was added to a solution of **9a** (119 mg, 0.20 mmol) in THF (2 mL) and the suspension was stirred at room temperature for 20 minutes before filtration through a 3 cm pad of celite (washing with 1 mL of THF) into a vial containing  $[\text{Ir}(\text{cod})\text{Cl}]_2$  (71.8 mg, 0.107 mmol, 1.07 equiv) and the resulting suspension was stirred for 1 hour at room temperature. The vial was removed from the glovebox and the contents filtered through a 3 cm pad of silica gel and the filtrate purified by flash column chromatography (4:1 hexane:EtOAc). The resulting yellow solid **(9a)Ir(cod)Cl** was dissolved in  $\text{CH}_2\text{Cl}_2$  (3 mL) and CO (balloon pressure) was bubbled through the stirred solution for 5 minutes. The solvent was removed under reduced pressure and the resulting solid purified by flash column chromatography (3:1 hexane:EtOAc) to give **15a** as a yellow solid (43.0 mg, 29% over two steps); mp: 110-112 °C; IR ( $\text{CH}_2\text{Cl}_2$ ):  $\nu = 2068.19$  (CO), 1986.32 (CO)  $\text{cm}^{-1}$ ; *Restricted rotation around the metal-carbene bond results in 3 sets of signals (1 major, 2 minor)*;  $^1\text{H-NMR}$  (400 MHz,  $\text{CDCl}_3$ ):  $\delta = 8.00\text{-}7.92$  (m, 2H), 7.61-7.50 (m, 4H), 7.37-7.28 (m, 2H), 6.80 (s, 1H), 3.75<sub>minor</sub> and 3.68<sub>major</sub> and 3.63<sub>minor</sub> (s, 3H), 3.71<sub>minor</sub> and 3.47<sub>major</sub> and 3.43<sub>minor</sub> (s, 3H),

2.87-2.76 (m, 1H), 2.53-2.41 (m, 1H), 1.44-1.40<sub>minor</sub> and 1.36-1.27<sub>major</sub> (m, 6H), 1.13 (d,  $J = 6.7$  Hz, 3H), 1.11-1.04 (m, 3H);  $^{13}\text{C}$ -NMR (101 MHz,  $\text{CDCl}_3$ ) *Only the major rotamer is reported*:  $\delta = 180.4$  (CO), 167.7 (CO), 159.8 (C), 150.3 (C), 147.2 (C), 145.6 (C), 145.3 (C), 136.1 (C), 131.3 (CH), 131.0 (CH), 129.5 (2CH), 126.7 (2CH), 125.5 (C), 124.5 (CH), 123.8 (CH), 119.7 (C), 99.0 (CH), 42.4 (CH<sub>3</sub>), 38.1 (CH<sub>3</sub>), 28.6 (2CH), 27.3 (CH<sub>3</sub>), 26.4 (CH<sub>3</sub>), 23.5 (CH<sub>3</sub>), 22.1 (CH<sub>3</sub>); Anal. calculated for  $\text{C}_{27}\text{H}_{29}\text{ClIrN}_3\text{O}_5\text{S}$ : C, 44.10; H, 3.98; N, 5.71. Found: C, 44.29; H, 4.06; N, 5.43.

### (9b)Ir(CO)<sub>2</sub>Cl (15b)

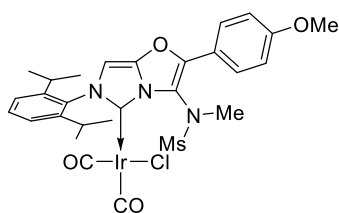

Inside a  $\text{N}_2$  filled glovebox NaOt-Bu (21.0 mg, 0.22 mmol) was added to a solution of **9b** (125 mg, 0.20 mmol) in THF (2 mL) and the suspension was stirred at room temperature for 20 minutes before filtration through a 3 cm pad of celite (washing with 1 mL of THF) into a vial containing  $[\text{Ir}(\text{cod})\text{Cl}]_2$  (70.0 mg, 0.104 mmol, 1.04 equiv) and the resulting suspension was stirred for 1 hour at room temperature. The vial was removed from the glovebox and the contents filtered through a 3 cm pad of silica gel and the filtrate purified by flash column chromatography (4:1 hexane:EtOAc). The resulting yellow solid (**9b**)Ir(cod)Cl was dissolved in  $\text{CH}_2\text{Cl}_2$  (3 mL) and CO (balloon pressure) was bubbled through the stirred solution for 5 minutes. The solvent was removed under reduced pressure and the resulting solid purified by flash column chromatography (3:1 hexane:EtOAc) to give **15b** as a yellow solid (34.2 mg, 22% over two steps); mp: 114-116 °C; IR ( $\text{CH}_2\text{Cl}_2$ ):  $\nu = 2067.92$  (CO), 1985.97 (CO)  $\text{cm}^{-1}$ ; *Restricted rotation around the metal-carbene bond results in 3 sets of signals (1 major, 2 minor)*;  $^1\text{H}$ -NMR (400 MHz,  $\text{CDCl}_3$ ):  $\delta = 7.94$ -7.87 (m, 2H), 7.56-7.49 (m, 1H), 7.36-7.28 (m, 2H), 7.10-7.03 (m, 2H), 6.78 (s, 1H), 3.89 (s, 3H), 3.74<sub>minor</sub> and 3.68<sub>major</sub>\* and 3.62<sub>minor</sub> (s, 3H), 3.68<sub>minor</sub>\* and 3.46<sub>major</sub> and 3.42<sub>minor</sub> (s, 3H), 2.88-2.74 (m, 1H), 2.55-2.41 (m, 1H), 1.44-1.39 and 1.35-1.27 (m, 6H), 1.16-1.10 (m, 3H), 1.10-1.03 (m, 3H);  $^{13}\text{C}$ -NMR (101 MHz,  $\text{CDCl}_3$ ) *Only the major rotamer is reported*:  $\delta = 180.4$  (CO), 167.7 (CO), 161.9 (C), 159.3 (C), 150.5 (C), 147.3 (C), 145.5 (C), 145.4 (C), 136.1 (C), 131.0 (CH), 128.4 (2CH), 124.5 (CH), 124.4 (C), 123.8 (CH), 117.8 (C), 114.9 (2CH), 98.9 (CH), 55.6 (CH<sub>3</sub>), 42.4 (CH<sub>3</sub>), 38.0 (CH<sub>3</sub>), 28.62 (CH), 28.61 (CH), 27.3 (CH<sub>3</sub>), 26.4 (CH<sub>3</sub>), 23.5 (CH<sub>3</sub>), 22.1 (CH<sub>3</sub>); Anal. calculated for  $\text{C}_{28}\text{H}_{31}\text{ClIrN}_3\text{O}_6\text{S}$ : C, 43.94; H, 4.08; N, 5.49. Found: C, 44.25; H, 4.22; N, 5.32. \*The overlap of these two signals was determined using an HSQC spectrum.

## Attempted cyclisation conditions from imine 6

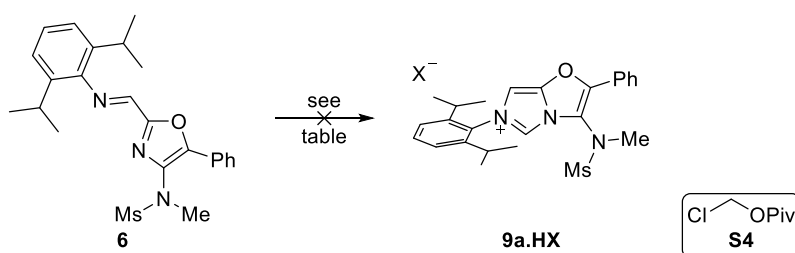

| Entry | Reagent                                                    | Solvent                         | Temperature <sup>[a]</sup> | X   | Yield |
|-------|------------------------------------------------------------|---------------------------------|----------------------------|-----|-------|
| 1     | <b>S4</b>                                                  | MeCN                            | 81 °C                      | Cl  | 0%    |
| 2     | <b>S4</b>                                                  | Ph <sub>2</sub> O               | 195 °C                     | Cl  | 0%    |
| 3     | <b>S4</b> , AgOTf                                          | CH <sub>2</sub> Cl <sub>2</sub> | 40 °C                      | OTf | 0%    |
| 4     | <b>S4</b> , AgOTf                                          | 1,4-dioxane                     | 120 °C                     | OTf | 0%    |
| 5     | <b>S4</b> , NaI                                            | MeCN                            | 70 °C                      | I   | 0%    |
| 6     | <b>S4</b> , NaI, ZnCl <sub>2</sub>                         | MeCN                            | 70 °C                      | I   | 0%    |
| 7     | (CH <sub>2</sub> O) <sub>n</sub> , ZnCl <sub>2</sub> , HCl | THF                             | 60 °C                      | Cl  | 0%    |
| 8     | (CH <sub>2</sub> O) <sub>n</sub> , TMSCl                   | EtOAc                           | 77 °C                      | Cl  | 0%    |
| 9     | CH <sub>2</sub> I <sub>2</sub>                             | MeCN                            | 100 °C                     | I   | 0%    |
| 10    | CH <sub>2</sub> I <sub>2</sub> , 2AgOTf                    | toluene                         | 110 °C                     | I   | 0%    |

[a] Reactions above the normal boiling point of the solvent were carried out in a sealed tube

## Catalysis

### Catalysis starting material synthesis

Catalysis starting materials were prepared according to the literature: **16** [12], **19** [13], **22** [14] and **24** [15].

### Hydration of alkyne **16**

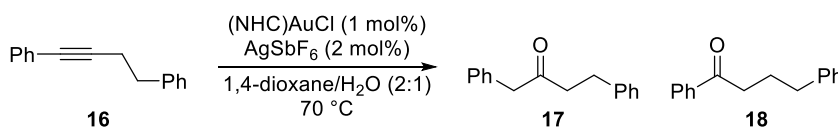

Following a literature procedure [16], AgSbF<sub>6</sub> (6.9 mg, 2 mol %), (NHC)AuCl (1 mol %), degassed 1,4-dioxane (670 μL), alkyne **16** (206 mg, 1.0 mmol) and degassed H<sub>2</sub>O (330 μL) were added to a Schlenk tube under an argon atmosphere and the reaction mixture was heated at 70 °C for 17 h. H<sub>2</sub>O (5 mL) was added and the mixture was extracted with CH<sub>2</sub>Cl<sub>2</sub> (2 × 5 mL). The combined organic extracts were dried over Na<sub>2</sub>SO<sub>4</sub> and purified by flash column chromatography (19:1 hexane:EtOAc) to give a mixture of ketones **17** and **18** as a clear oil. Product ratios were determined by <sup>1</sup>H-NMR spectroscopy with comparison to the literature spectra for **17** [17] and **18** [18].

Using IPrAuCl gave 196.7 mg (87%) with a 1.0:1.0 ratio of **17** and **18**; using **13** gave 167.9 mg (76%) with a 1.1:1.0 ratio of **17** and **18**.

### Arylative cyclisations

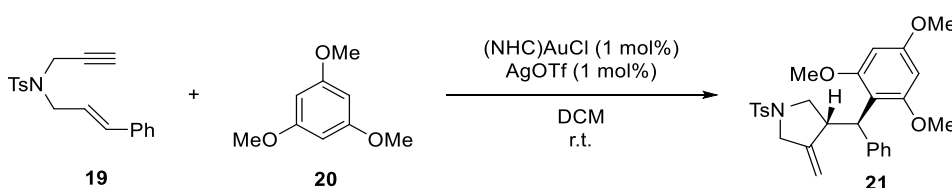

Following an adapted literature procedure [19], AgOTf (0.51 mg, 1 mol %), (NHC)AuCl (4 mM in CH<sub>2</sub>Cl<sub>2</sub>, 0.5 mL, 2 μmol) and CH<sub>2</sub>Cl<sub>2</sub> (0.5 mL) were added to a vial and stirred at room temperature for 10 minutes. The catalytic mixture was then added to a vial containing **19** (65.1 mg, 0.2 mmol), **20** (100.9 mg, 0.6 mmol) in CH<sub>2</sub>Cl<sub>2</sub> (1 mL). The reaction was stirred at room temperature for 1 hour. The mixture was filtered through a short pad of silica (eluting with 1:1 hexane/EtOAc) and the solvents evaporated under reduced pressure. Product yield was determined by <sup>1</sup>H-NMR spectroscopy relative to an internal standard 1,2,4,5-tetramethylbenzene and with comparison to the literature spectra for **21** [19].



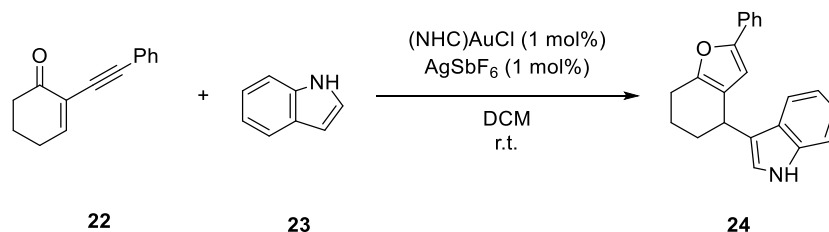

Following an adapted literature procedure [15], enone **22** (19.6 mg, 0.1 mmol), indole **23** (11.7 mg, 0.1 mmol), (NHC)AuCl (2 mM in CH<sub>2</sub>Cl<sub>2</sub>, 0.5 mL, 1 μmol) and AgSbF<sub>6</sub> (2 mM in CH<sub>2</sub>Cl<sub>2</sub>, 0.5 mL, 1 μmol) were added to a vial. The reaction was stirred for 4 h at rt. The reaction was diluted with Et<sub>2</sub>O (2 mL) and passed through a pad of silica eluting with Et<sub>2</sub>O (3 × 1 mL). The solvent was evaporated under reduced pressure. Product yield was determined by <sup>1</sup>H-NMR spectroscopy relative to an internal standard 1,2,4,5-tetramethylbenzene and with comparison to the literature spectra for **24** [20].

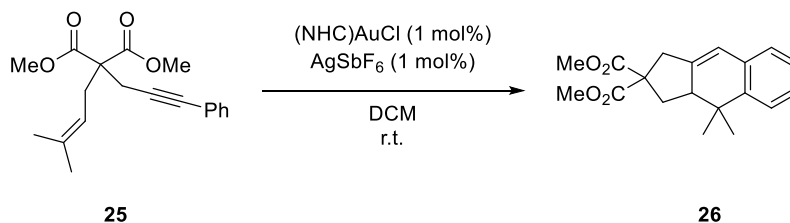

Following an adapted literature procedure [21], enyne **25** (31.4 mg, 0.1 mmol), (NHC)AuCl (2 mM in CH<sub>2</sub>Cl<sub>2</sub>, 0.5 mL, 1 μmol) and AgSbF<sub>6</sub> (2 mM in CH<sub>2</sub>Cl<sub>2</sub>, 0.5 mL, 1 μmol) were added to a vial. The reaction was stirred for 4 h at rt. The reaction was diluted with Et<sub>2</sub>O (2 mL) and passed through a pad of silica eluting with Et<sub>2</sub>O (3 × 1 mL). The solvent was evaporated under reduced pressure. Product yield was determined by <sup>1</sup>H-NMR spectroscopy relative to an internal standard 1,2,4,5-tetramethylbenzene and with comparison to the literature spectra for **26** [21].

## NMR spectra

**((2,6-Diisopropylphenyl)glycyl)(pyridin-1-ium-1-yl)amide (2) in CDCl<sub>3</sub> <sup>1</sup>H and <sup>13</sup>C  
PENDANT NMR**

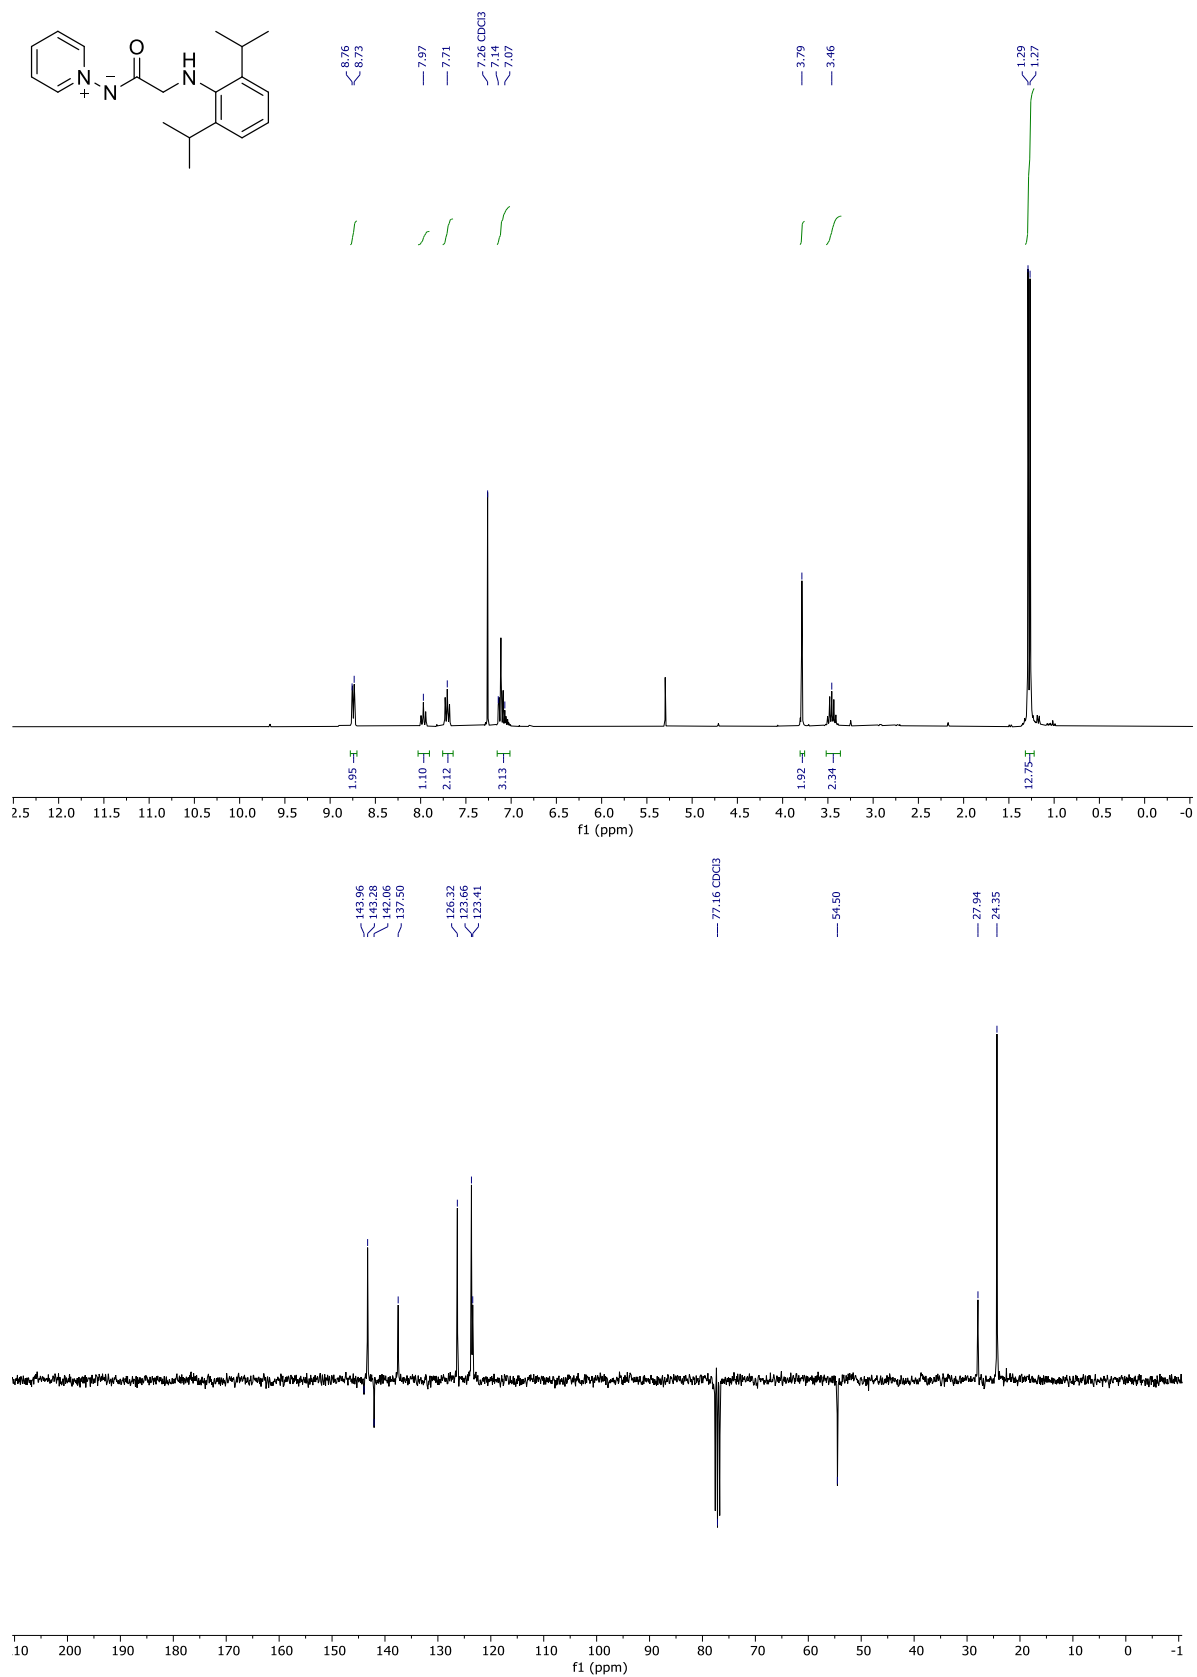

***N*-2-(((2,6-Diisopropylphenyl)amino)methyl)-5-phenyloxazol-4-yl)-*N*-methylmethanesulfonamide (3) in CDCl<sub>3</sub> <sup>1</sup>H and <sup>13</sup>C PENDANT NMR**

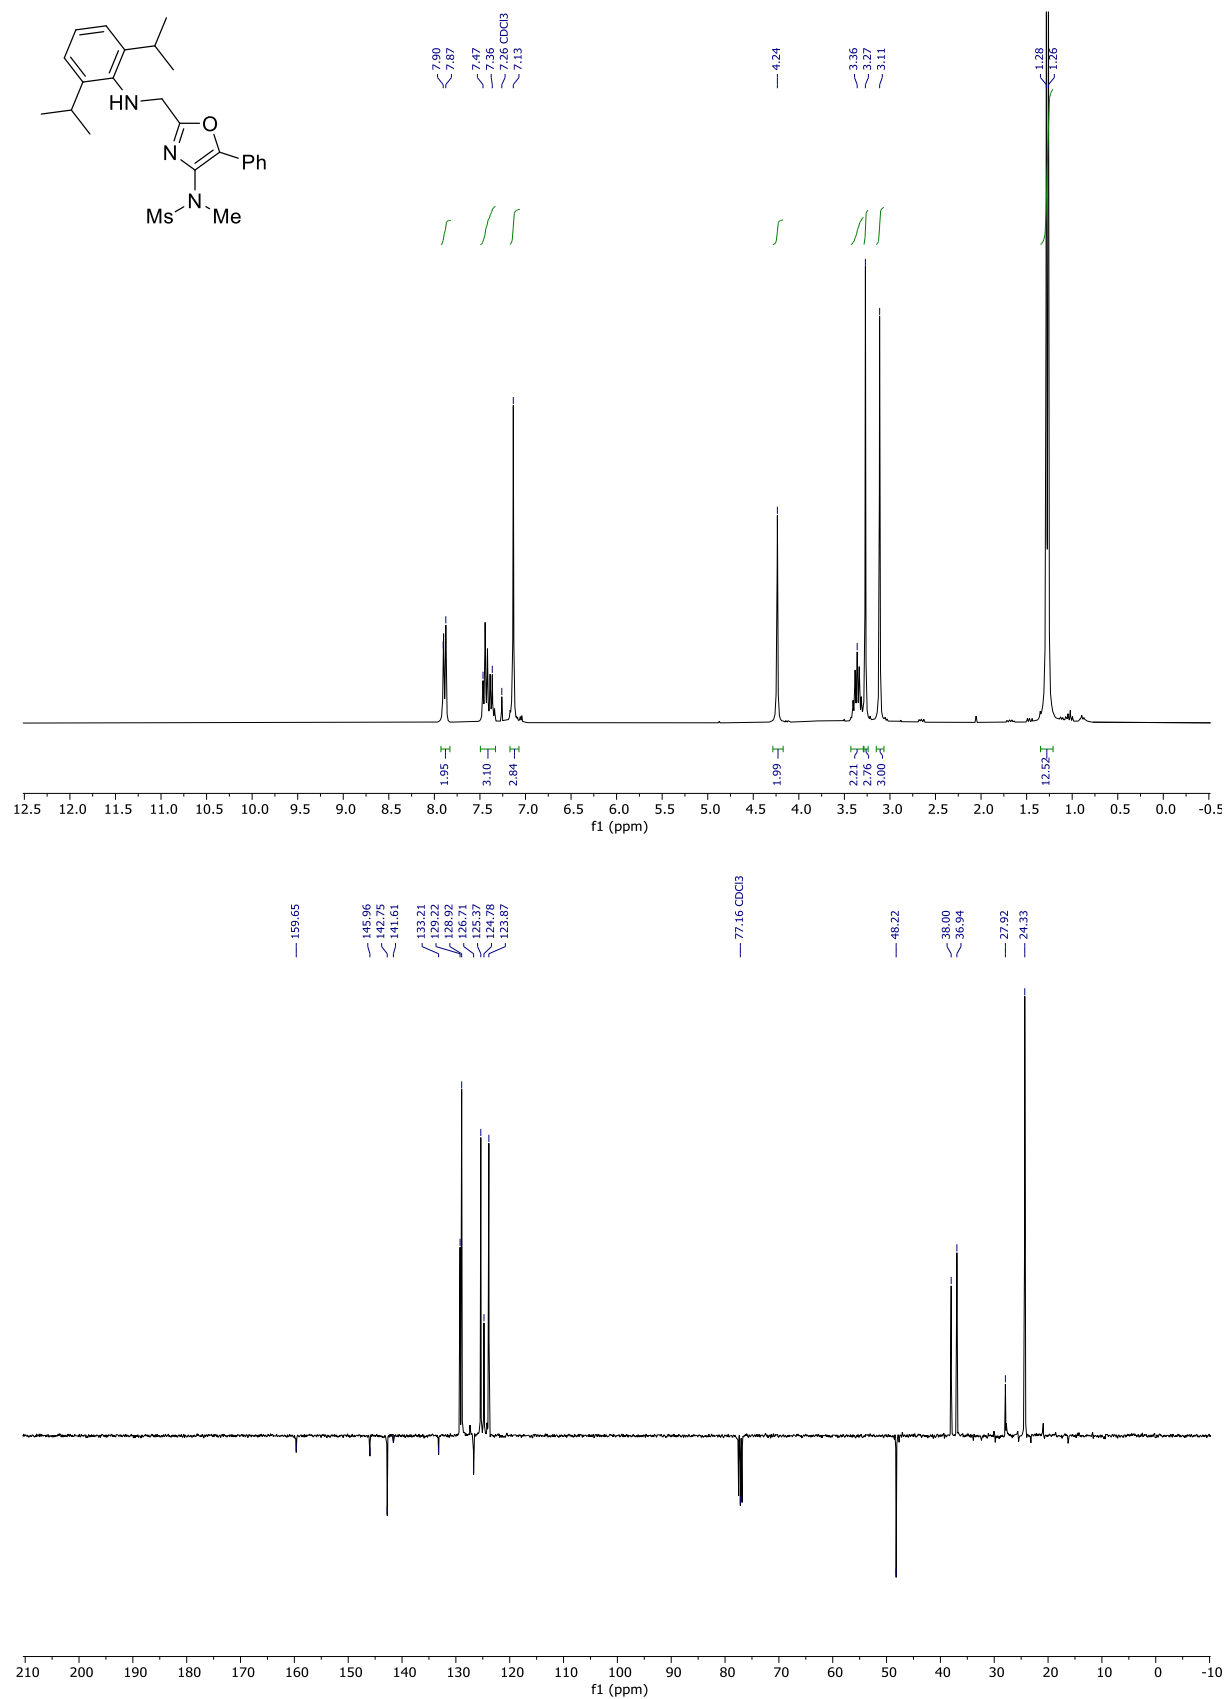

***N*-(2,6-Diisopropylphenyl)-*N*-formylglycyl(pyridin-1-ium-1-yl)amide (7) in CDCl<sub>3</sub> <sup>1</sup>H and <sup>13</sup>C PENDANT NMR**

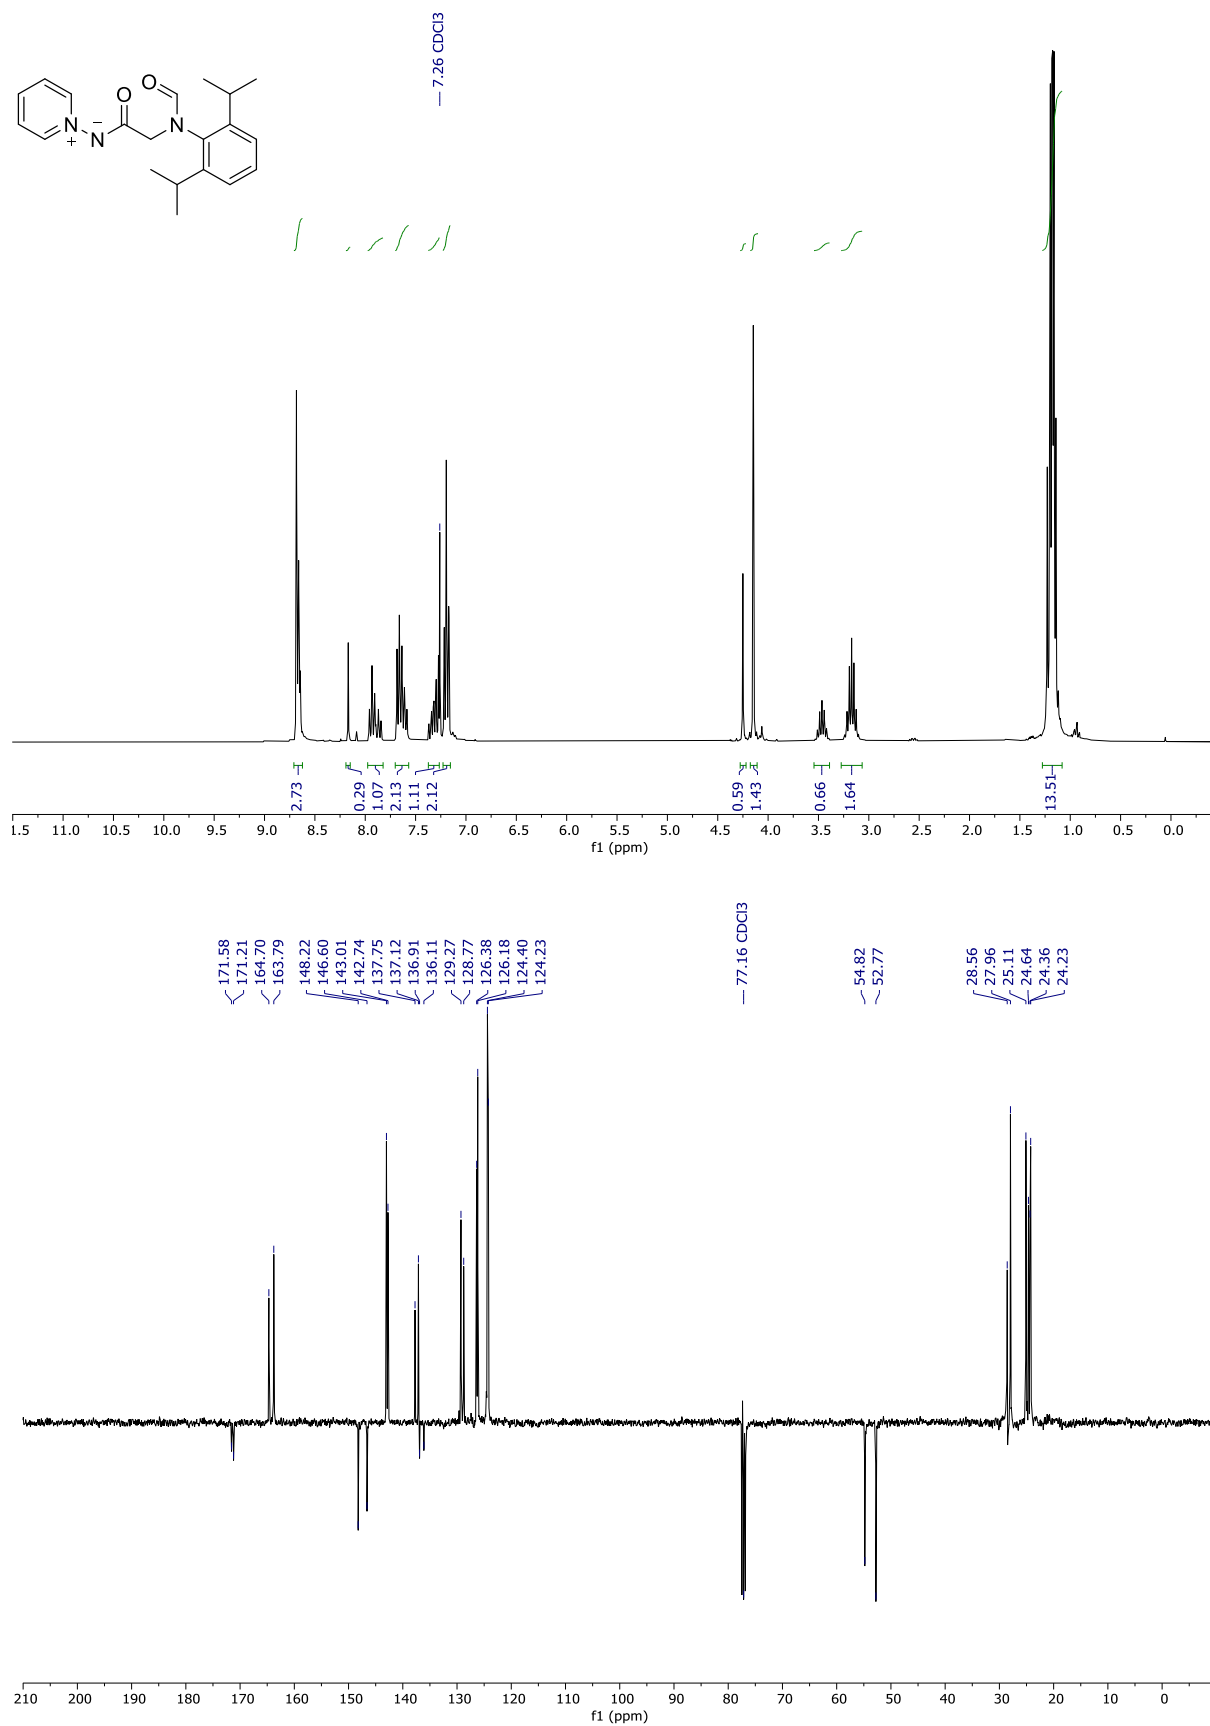

***N*-(2,6-Diisopropylphenyl)-*N*-((4-(*N*-methylmethanesulfonamido)-5-phenyloxazol-2-yl)methyl)formamide (8a) in CDCl<sub>3</sub> <sup>1</sup>H and <sup>13</sup>C PENDANT NMR**

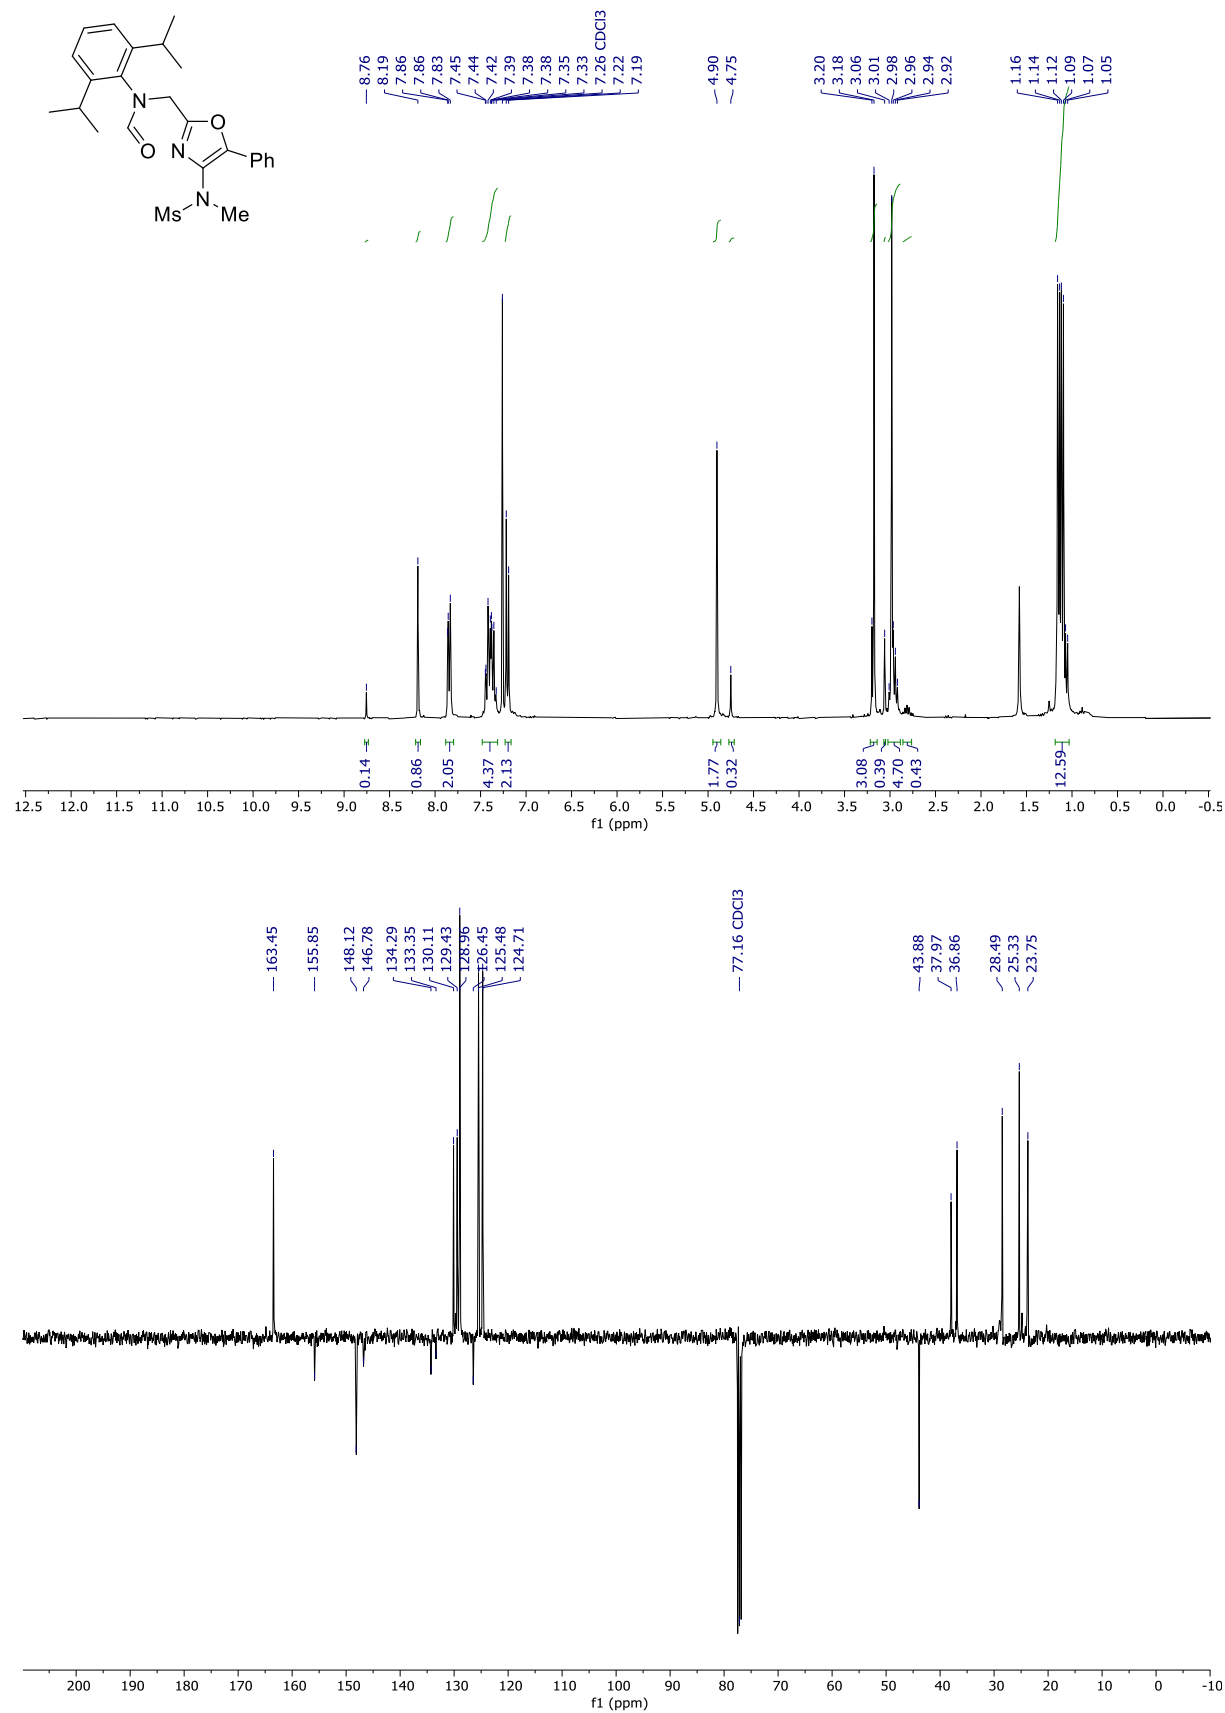

***N*-(2,6-Diisopropylphenyl)-*N*-((5-(4-methoxyphenyl)-4-(*N*-methylmethylsulfonamido)oxazol-2-yl)methyl)formamide (8b) in CDCl<sub>3</sub> <sup>1</sup>H and <sup>13</sup>C PENDANT NMR**

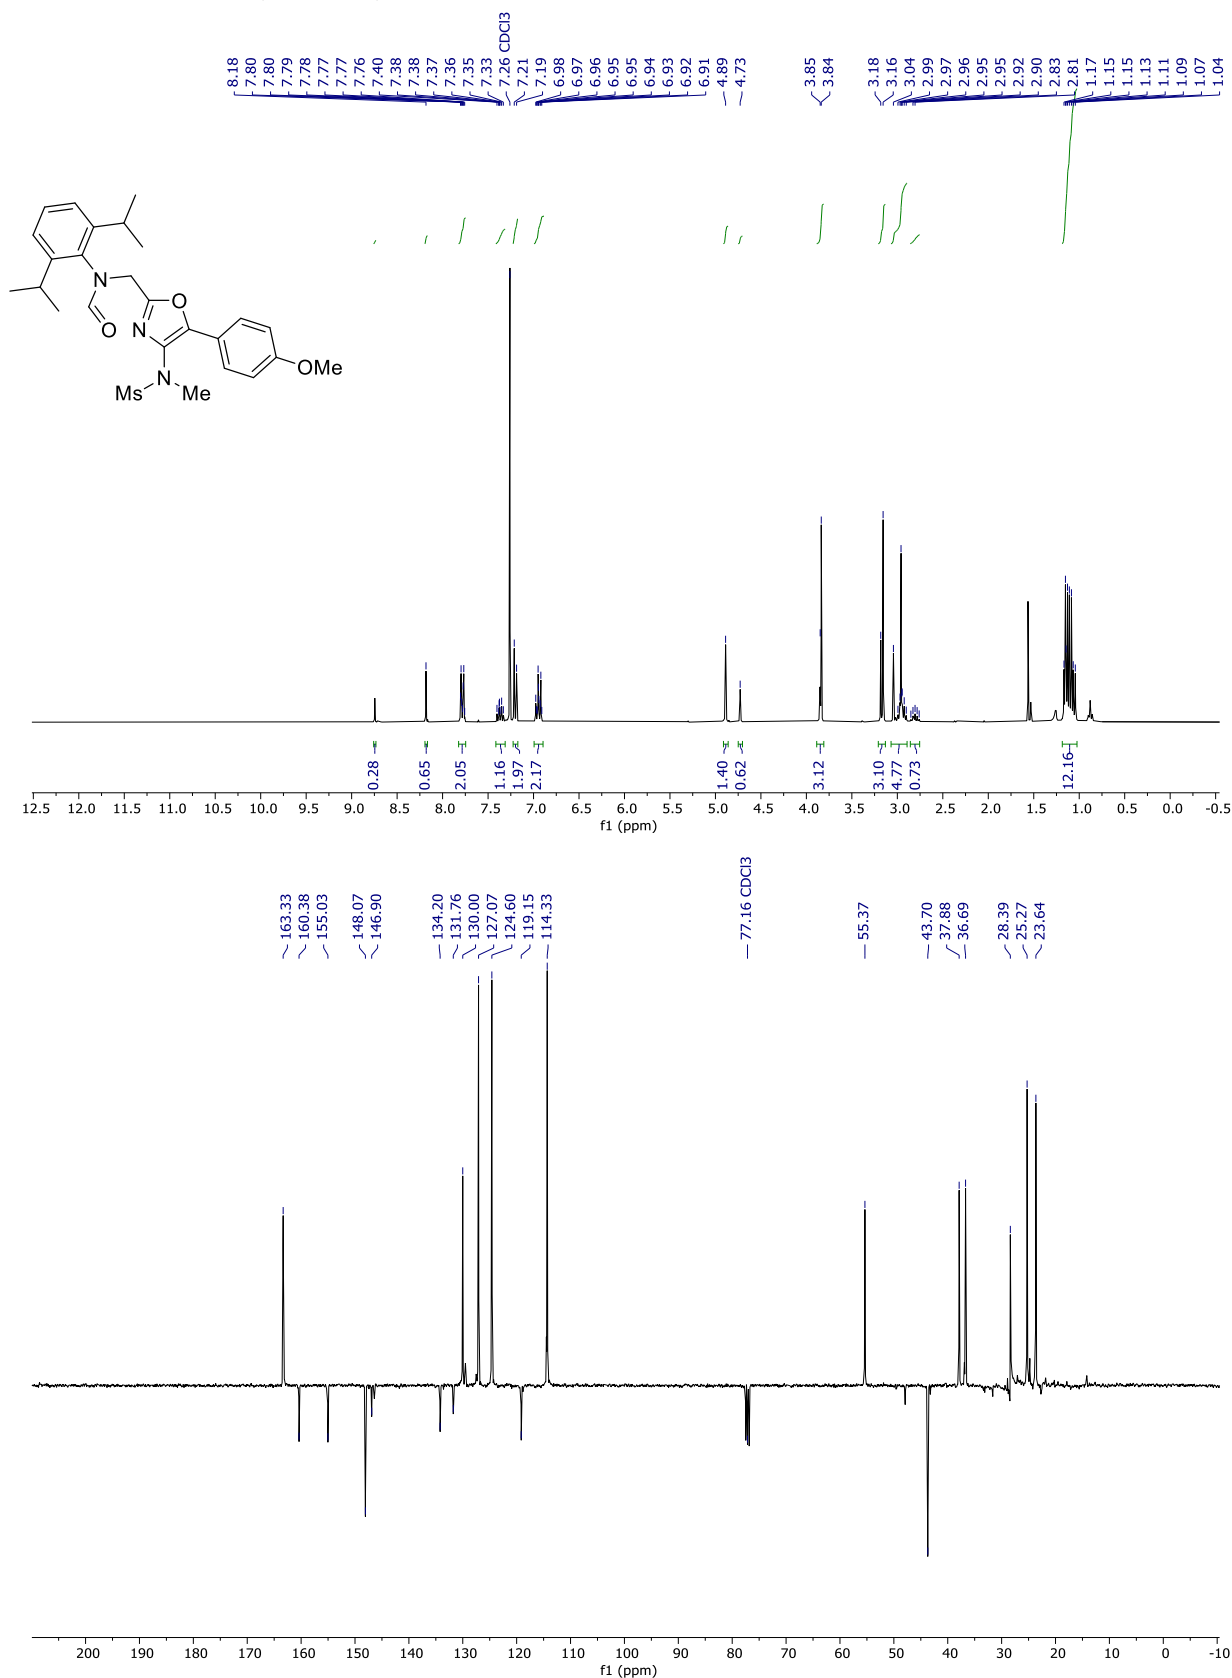

**6-(2,6-Diisopropylphenyl)-3-(*N*-methylmethananesulfonyl)-2-phenylimidazo[5,1-*b*]oxazol-6-ium hexafluorophosphate(V) (9a) in *d*<sup>6</sup>-acetone <sup>1</sup>H and <sup>13</sup>C UDEFT NMR**

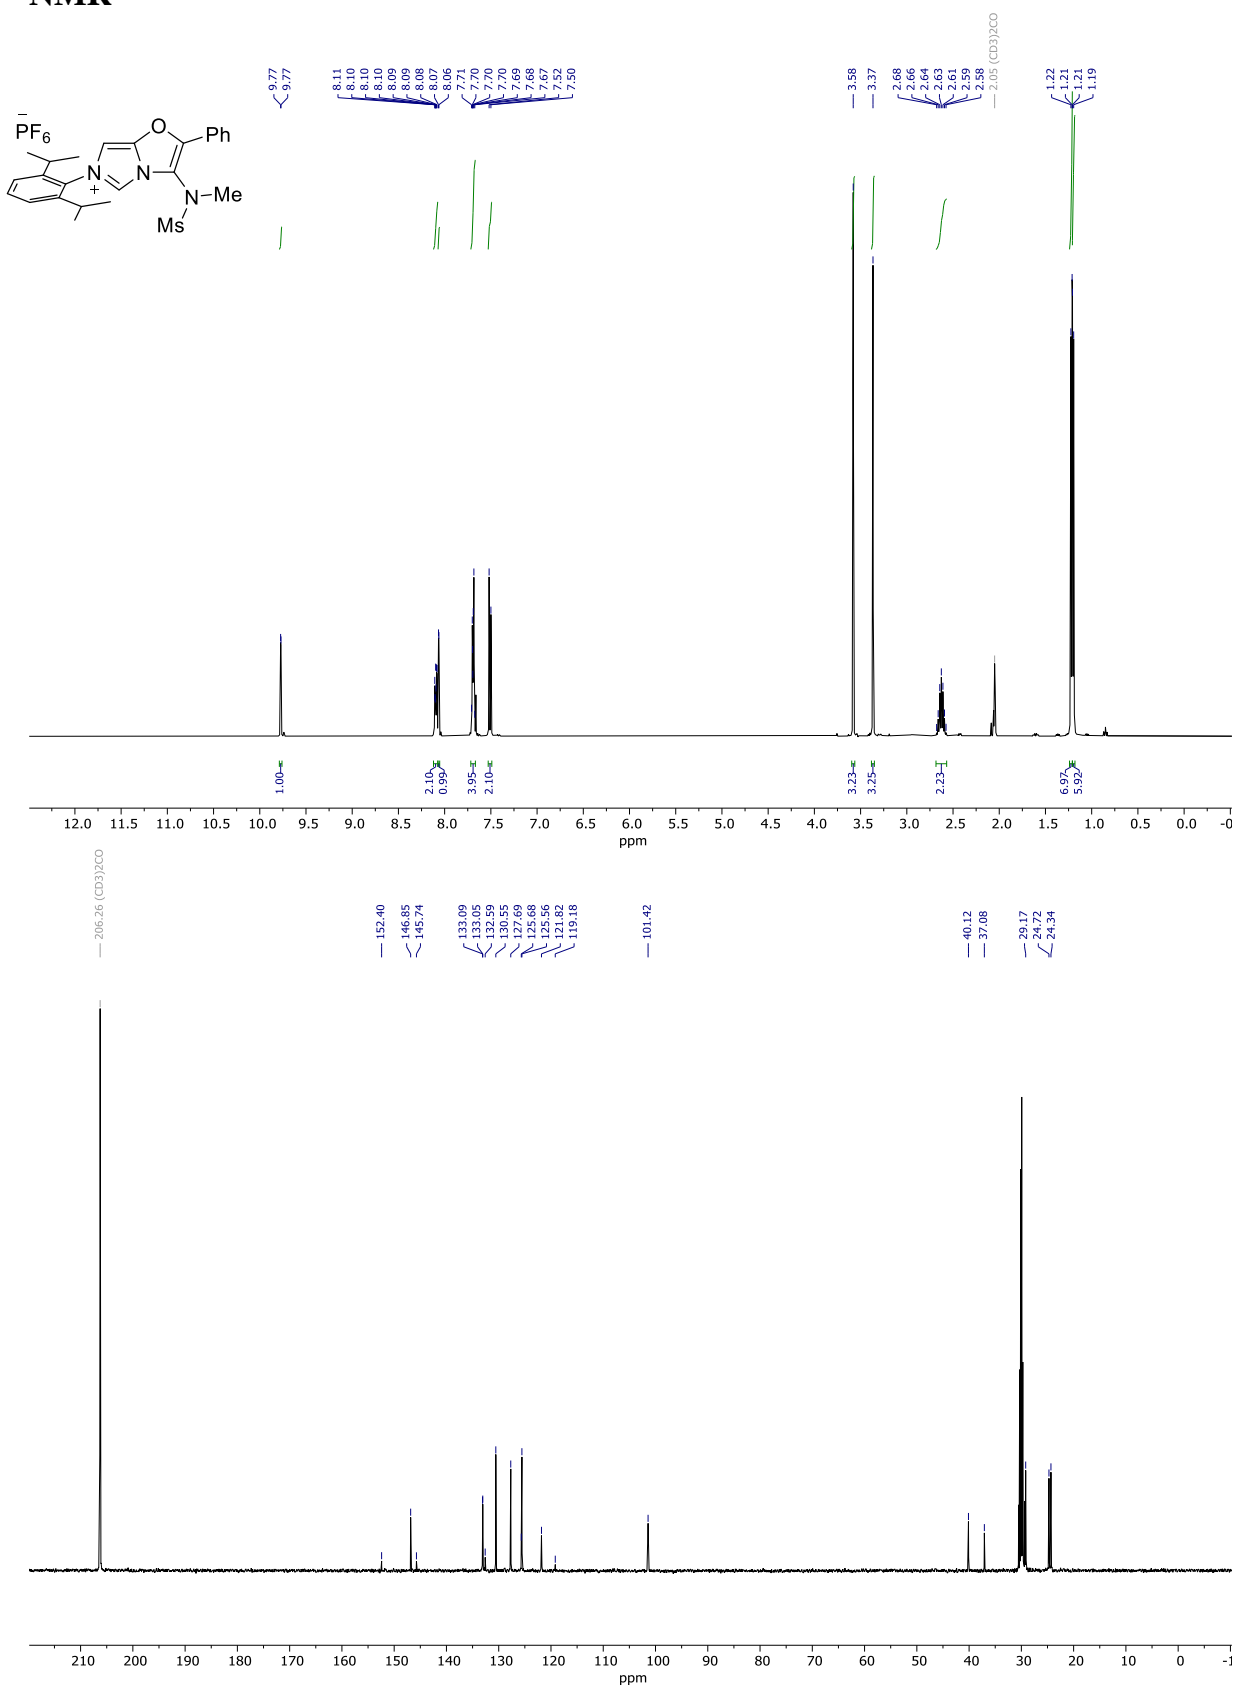

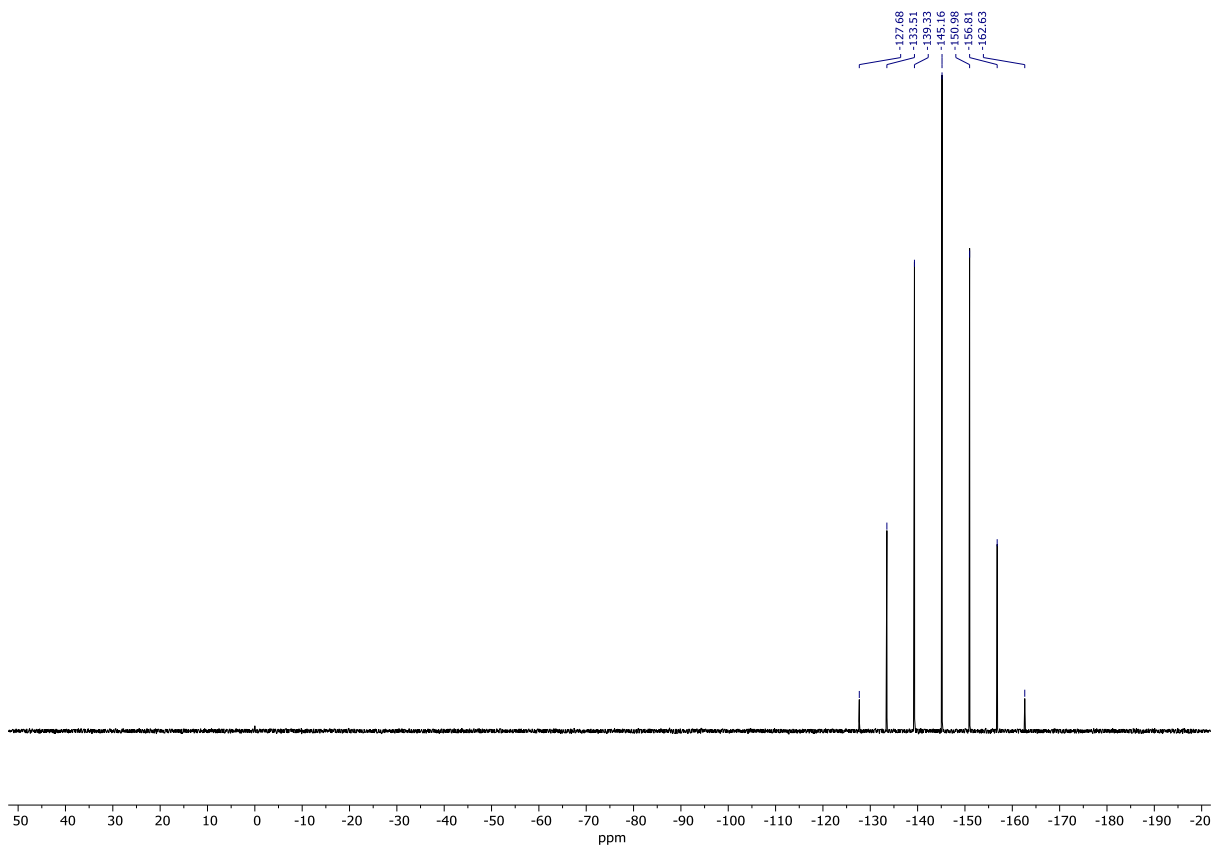

-71.37  
-73.87

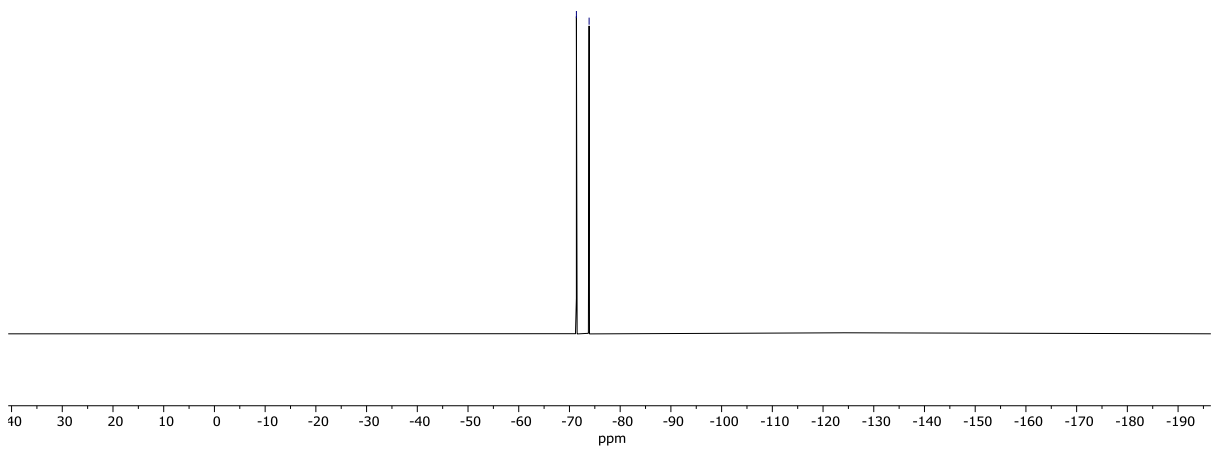



**6-(2,6-Diisopropylphenyl)-2-(4-methoxyphenyl)-3-(*N*-methylmethylsulfonamido)imidazo[5,1-*b*]oxazol-6-ium hexafluorophosphate(V) (9b) in CDCl<sub>3</sub> <sup>1</sup>H, <sup>13</sup>C UDEFT, <sup>31</sup>P{<sup>1</sup>H} and <sup>19</sup>F{<sup>1</sup>H} NMR**

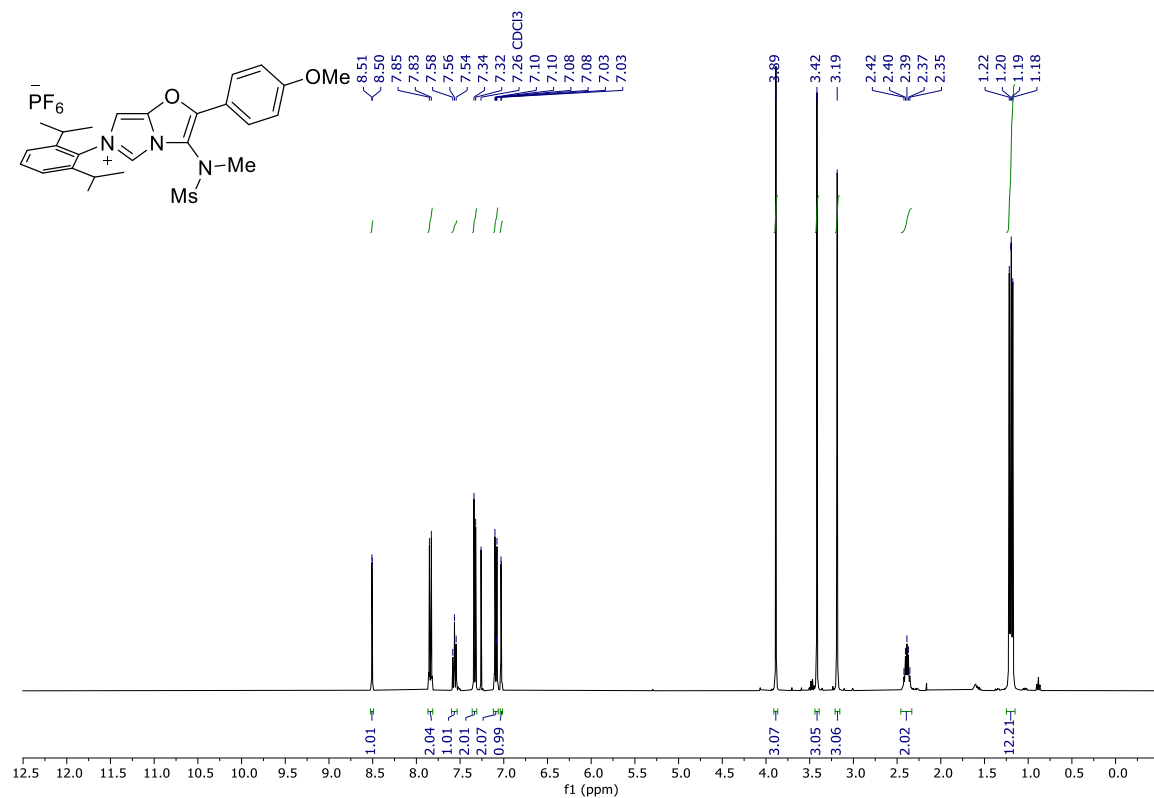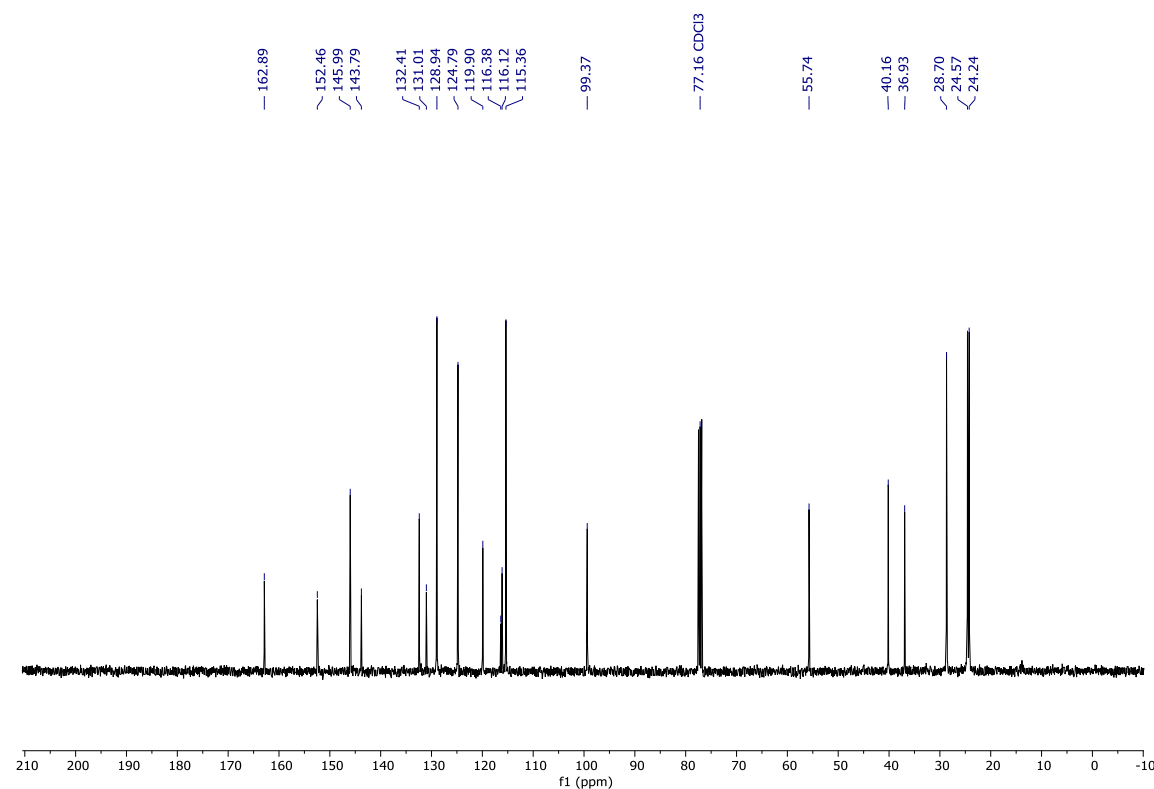

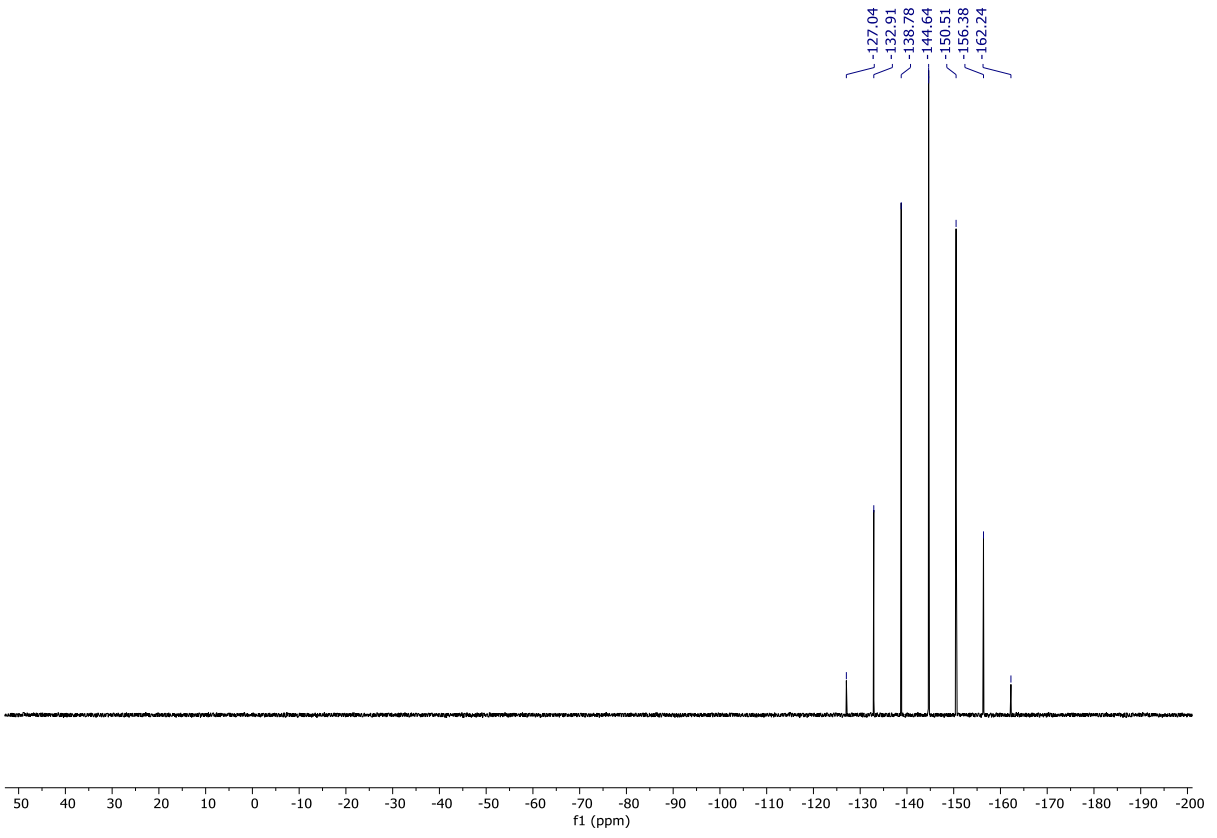

\ /

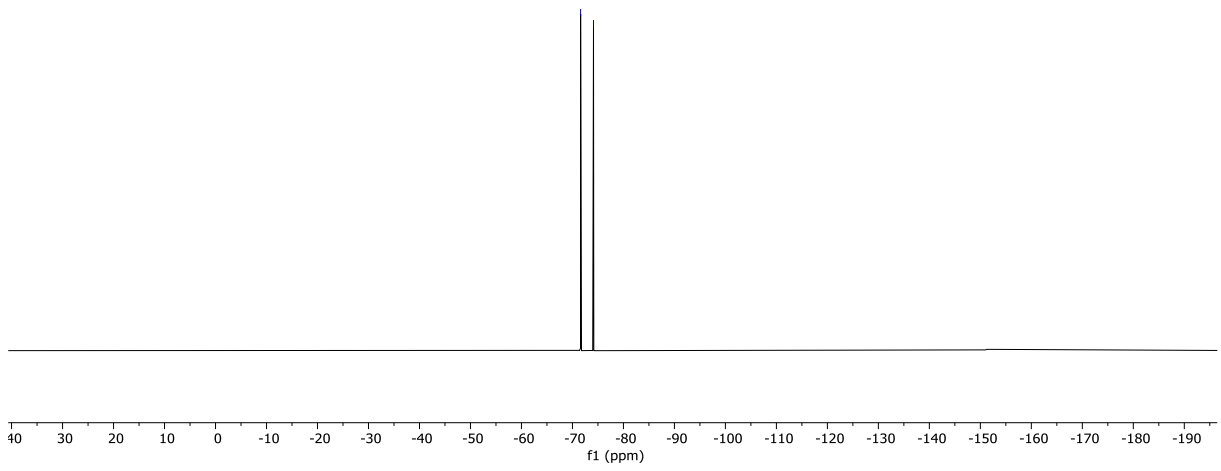

**(2,2-Dimethoxyacetyl)(pyridin-1-ium-1-yl)amide (4) in CDCl<sub>3</sub> <sup>1</sup>H and <sup>13</sup>C  
PENDANT NMR**

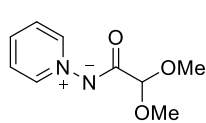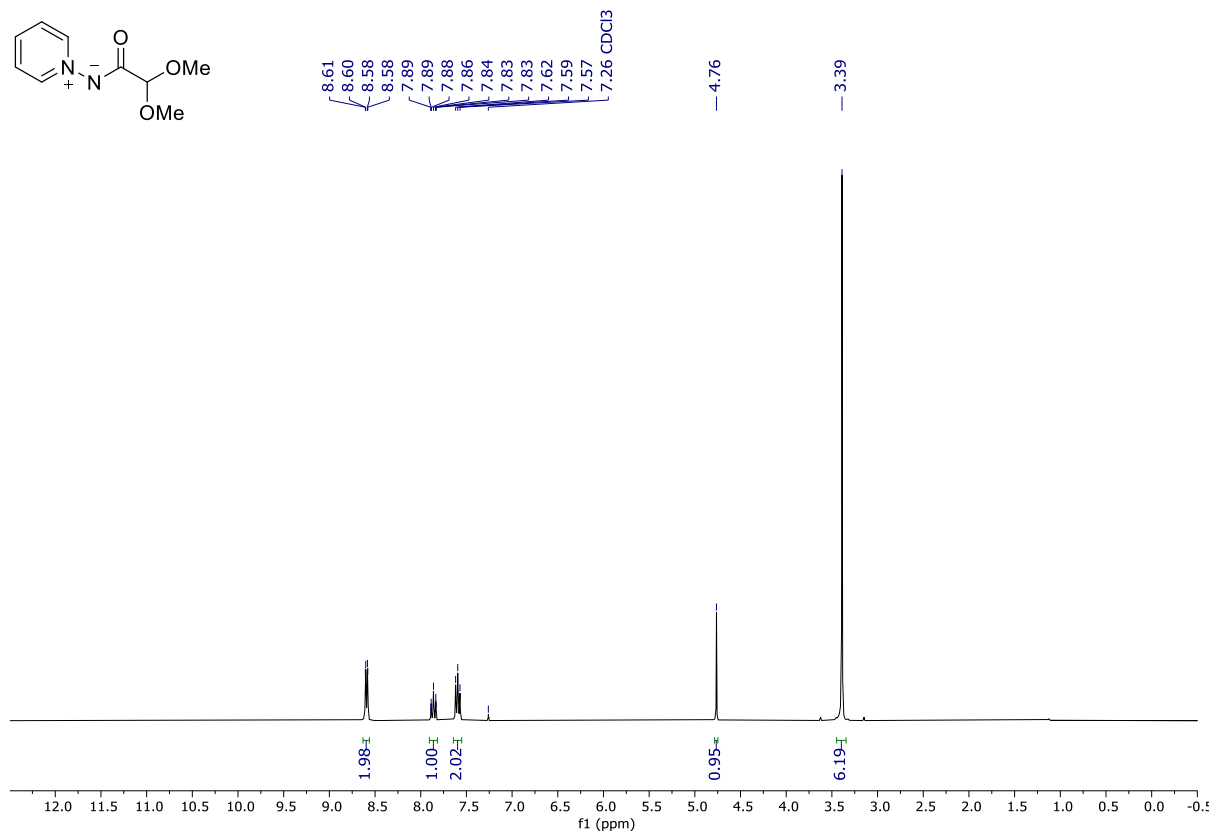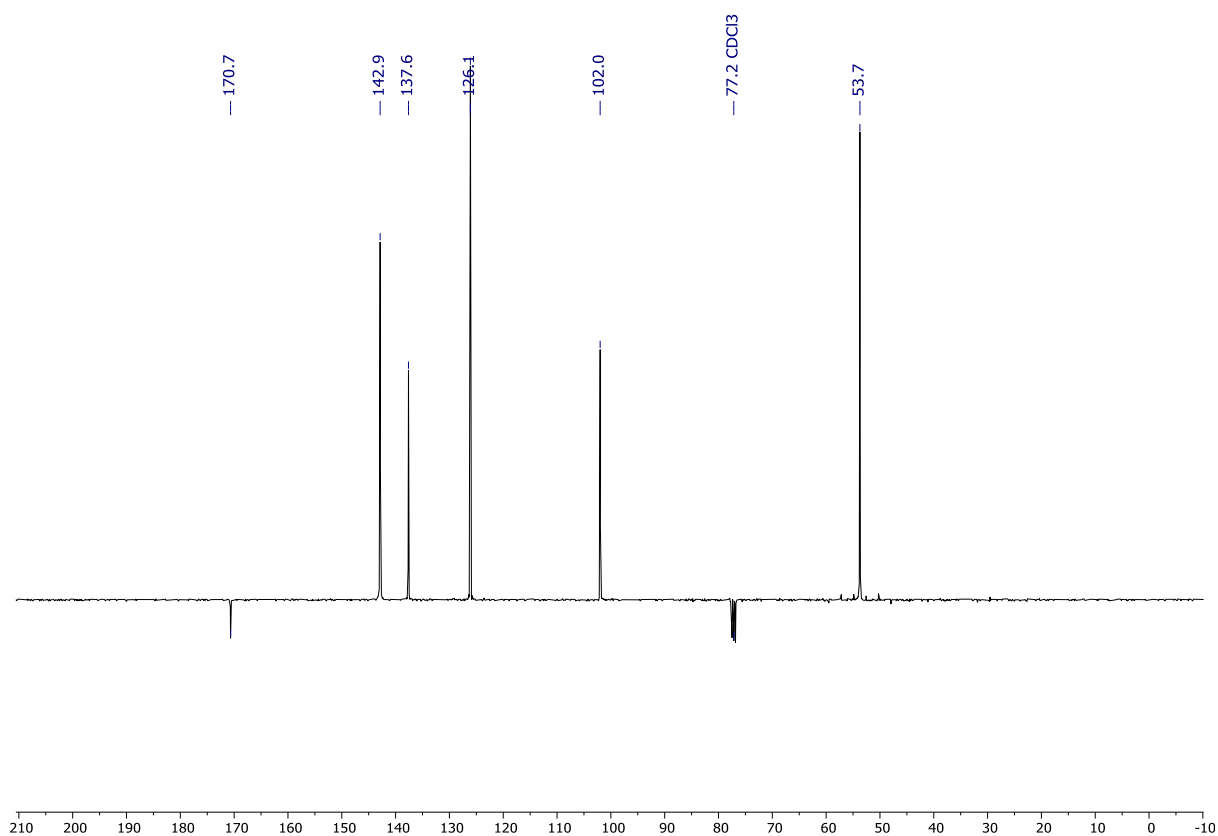

***N*-(2-(Dimethoxymethyl)-5-phenyloxazol-4-yl)-*N*-methylmethanesulfonamide (5)**  
in CDCl<sub>3</sub> <sup>1</sup>H and <sup>13</sup>C PENDANT NMR

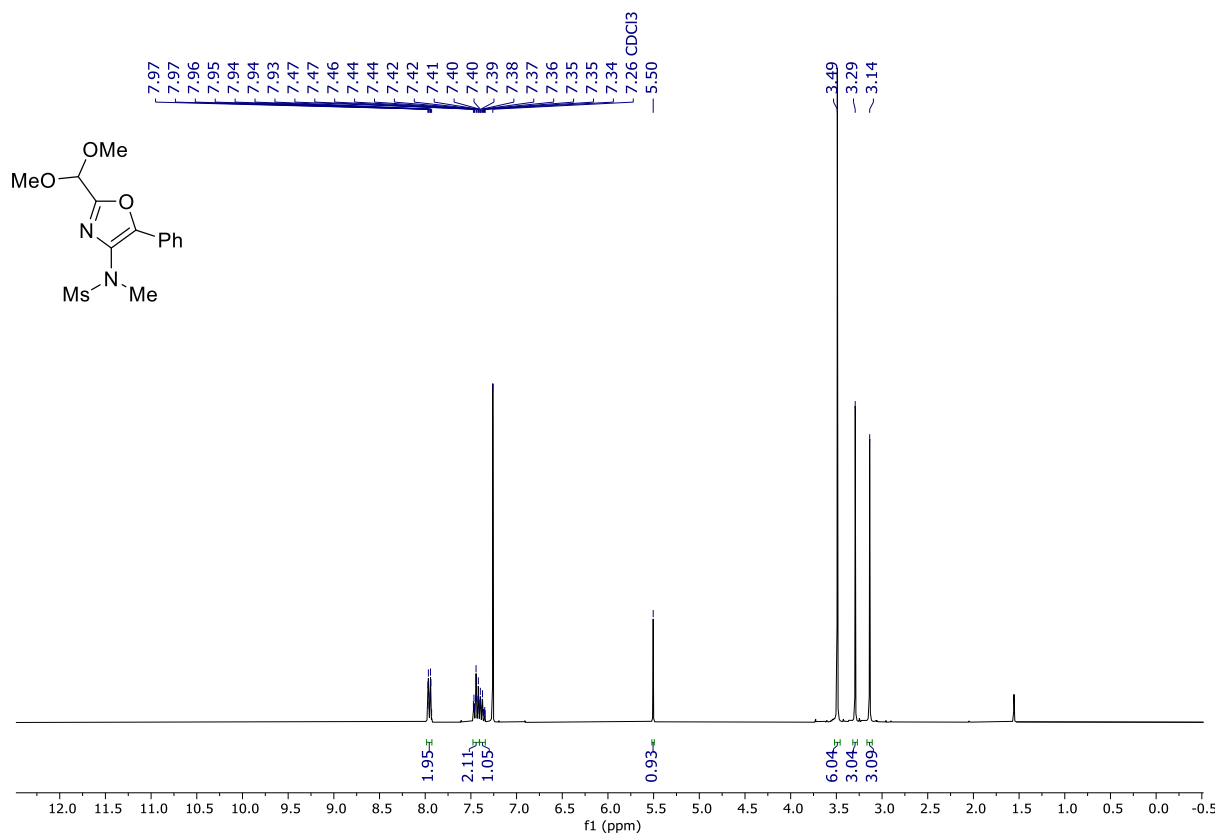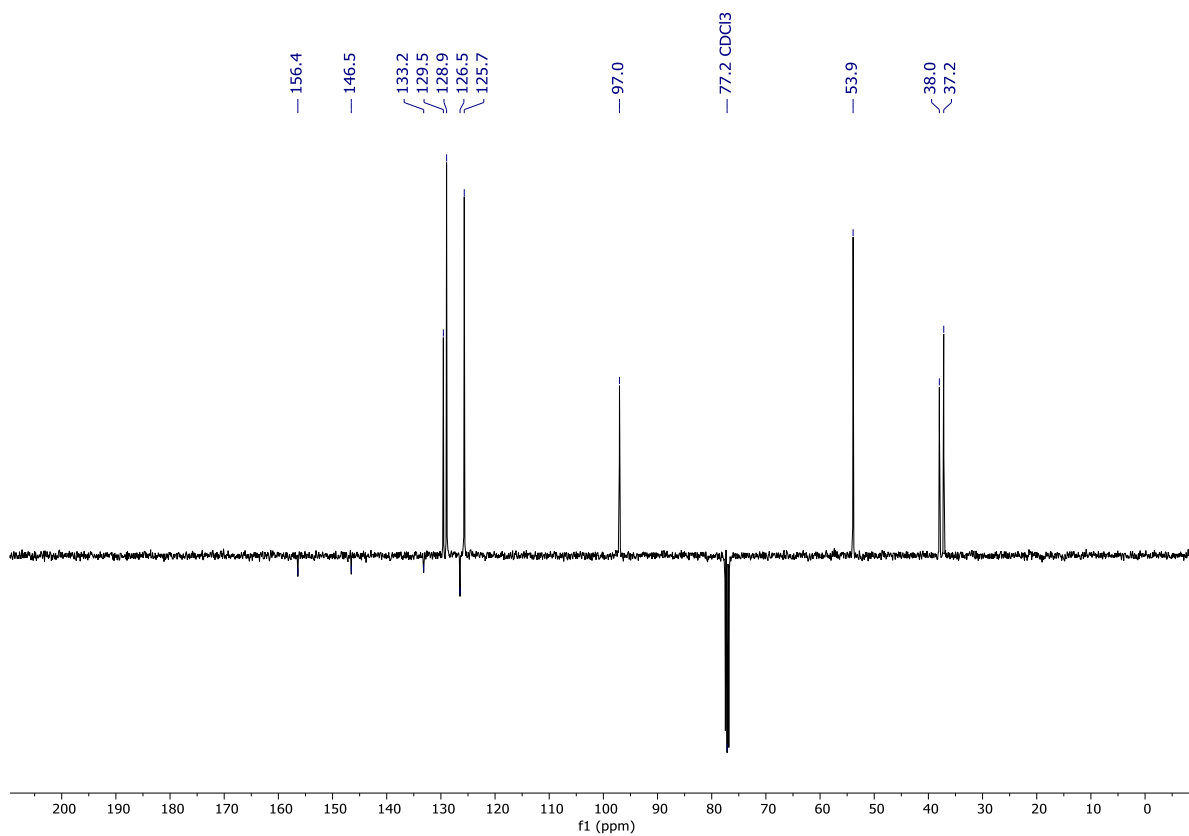

**(E)-N-(2-(((2,6-Diisopropylphenyl)imino)methyl)-5-phenyloxazol-4-yl)-N-methylmethanesulfonamide (6) in CDCl<sub>3</sub> <sup>1</sup>H and <sup>13</sup>C PENDANT NMR**

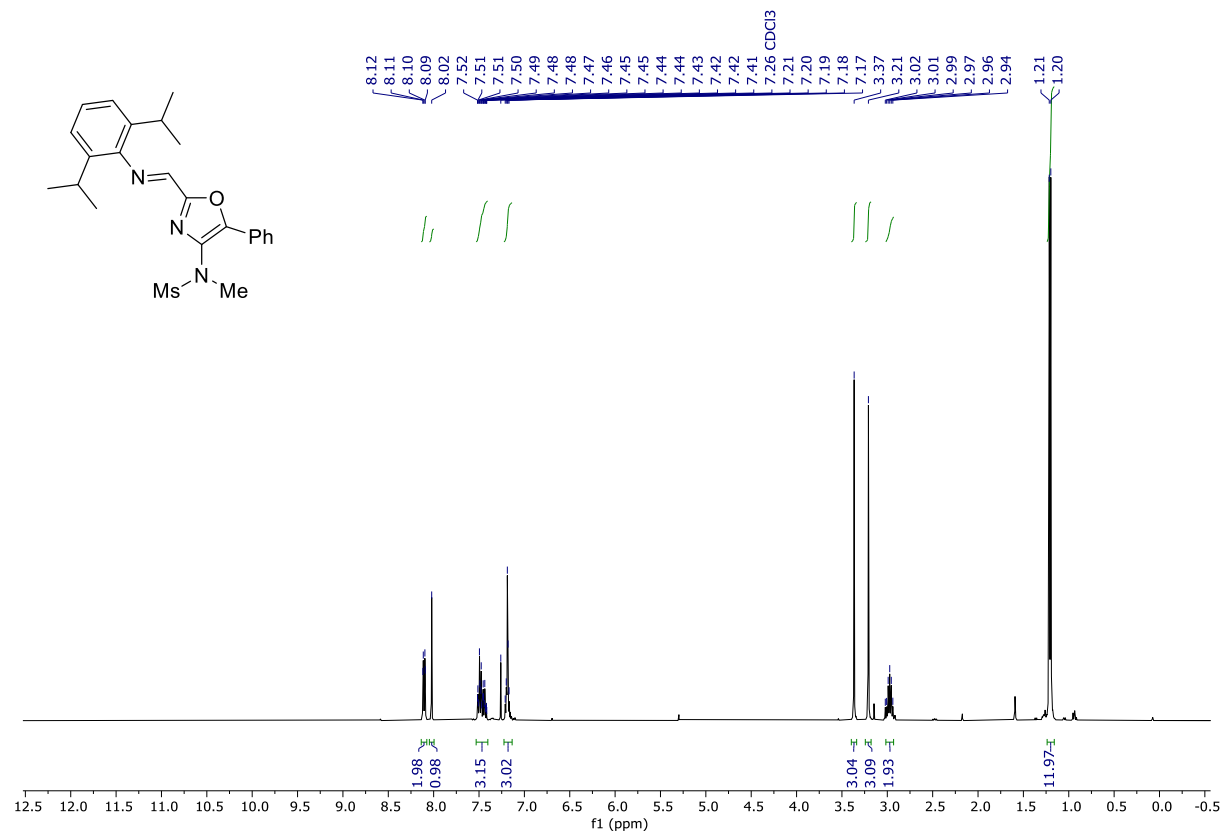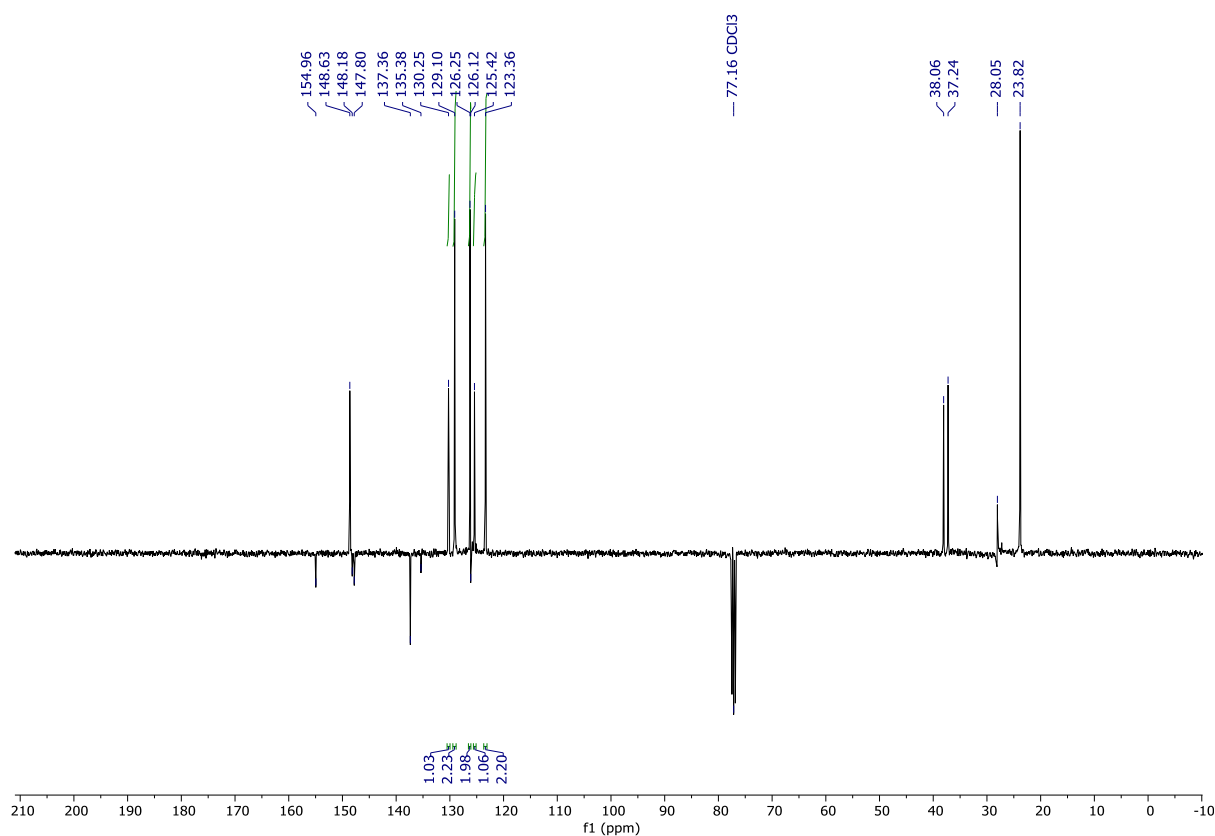

# Methyl (2,6-diisopropylphenyl)glycinate (11) in CDCl<sub>3</sub> <sup>1</sup>H and <sup>13</sup>C PENDANT NMR

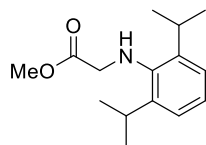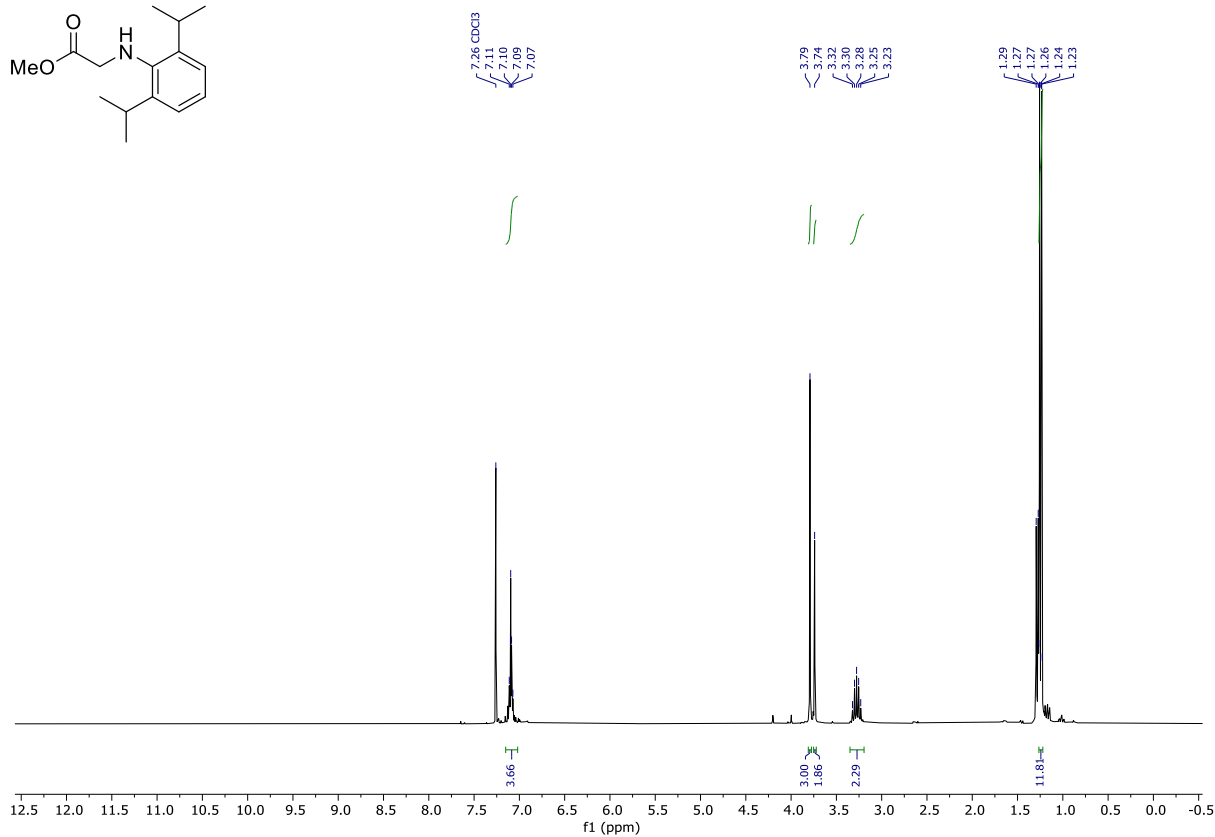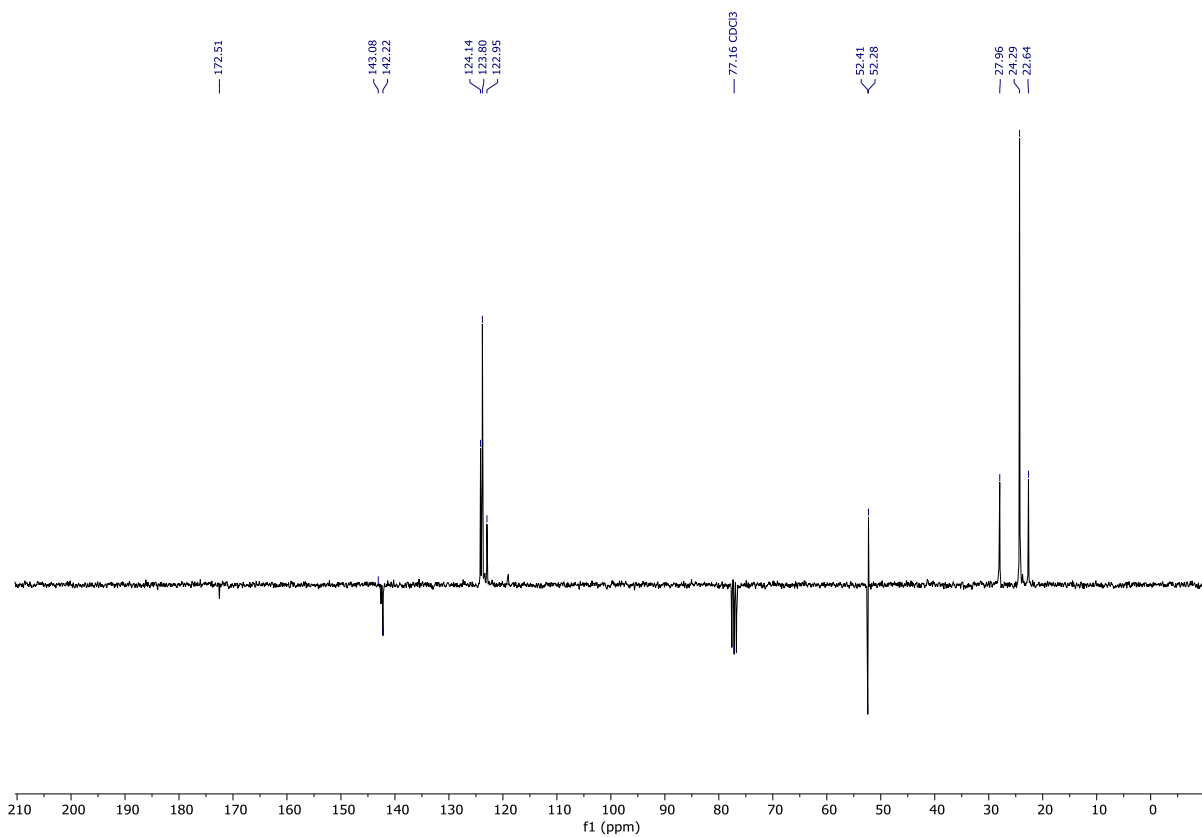

# Methyl *N*-(2,6-diisopropylphenyl)-*N*-formylglycinate (12) in CDCl<sub>3</sub> <sup>1</sup>H and <sup>13</sup>C PENDANT NMR

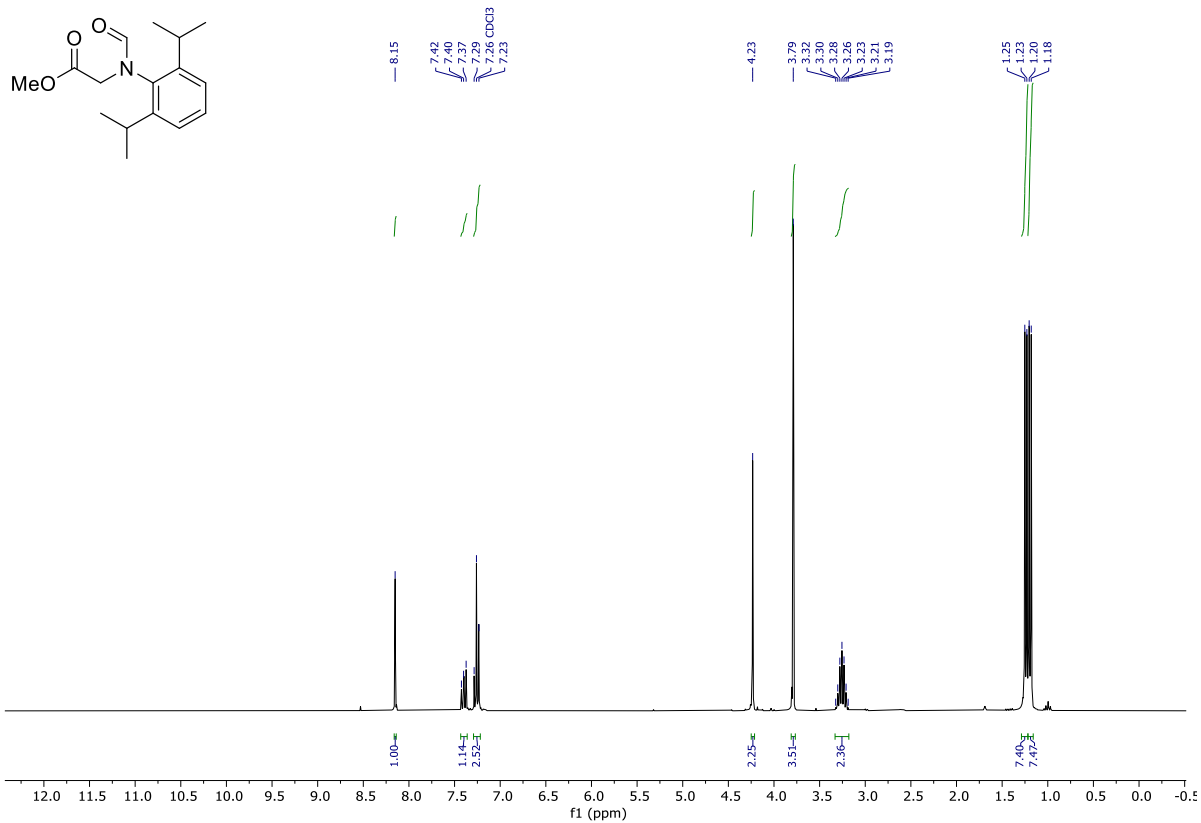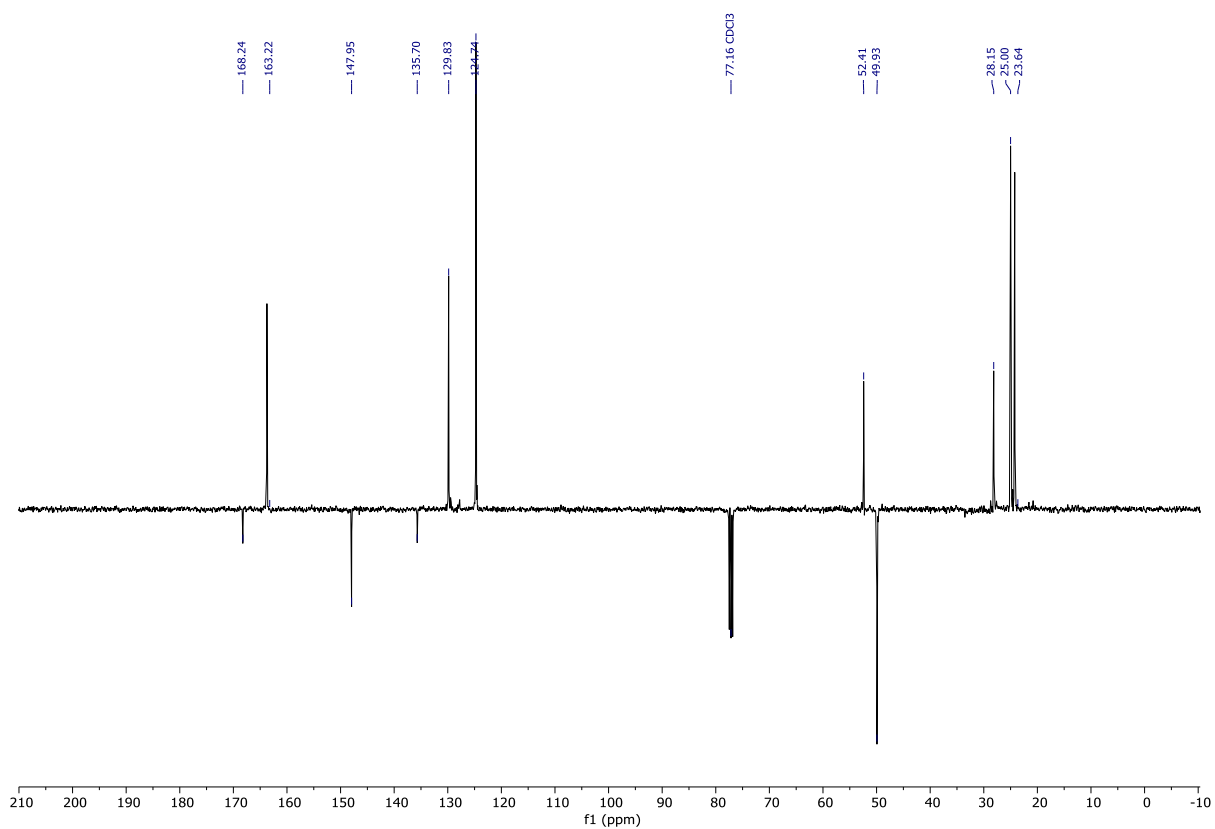

# AImOxAuCl (13) in CDCl<sub>3</sub> <sup>1</sup>H and <sup>13</sup>C UDEFT NMR

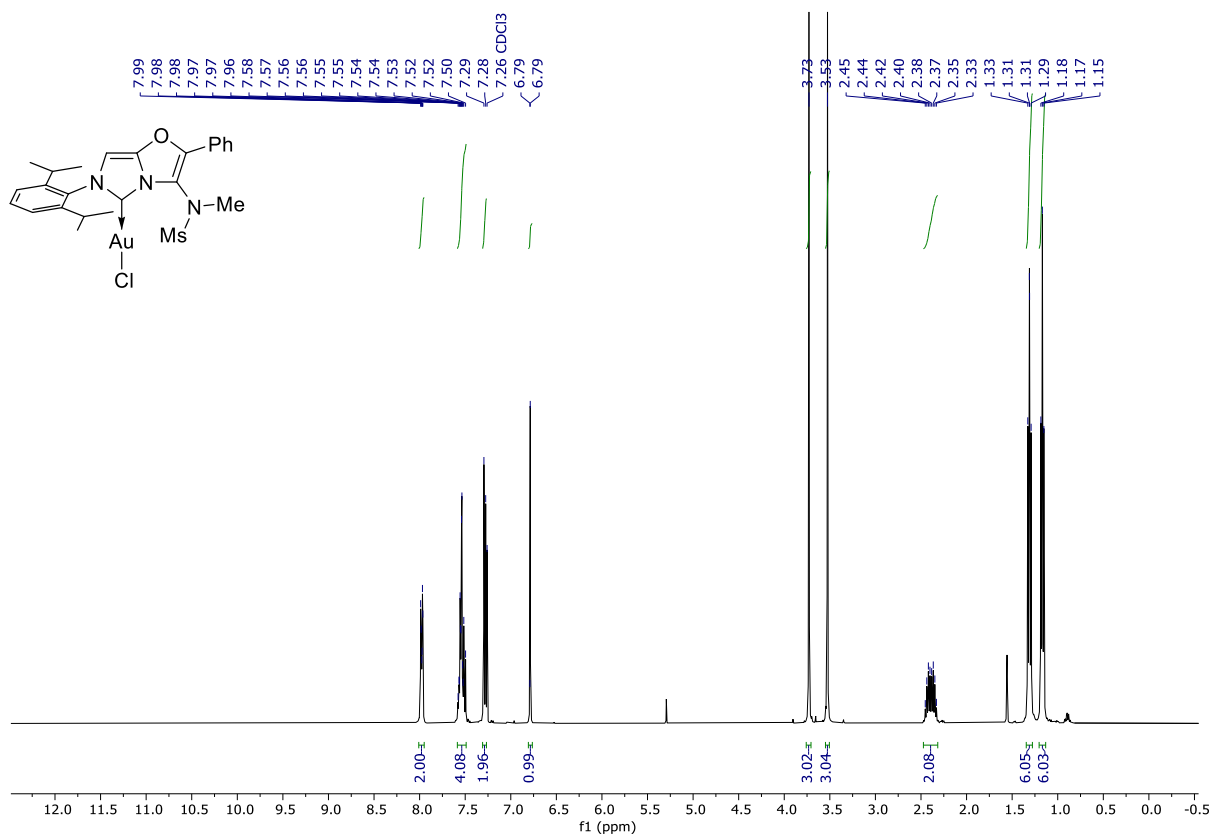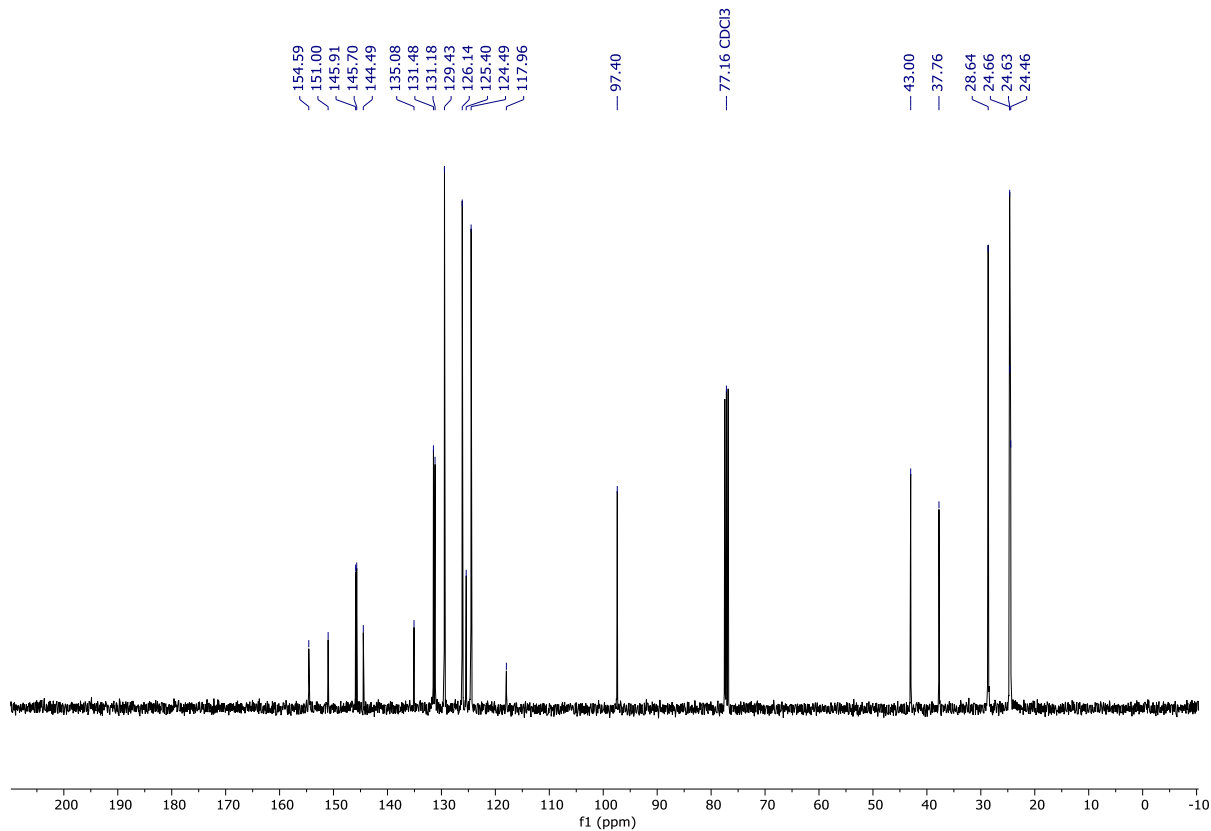



**AlmOxCuCl (14) in CDCl<sub>3</sub> <sup>1</sup>H and <sup>13</sup>C UDEFT NMR**

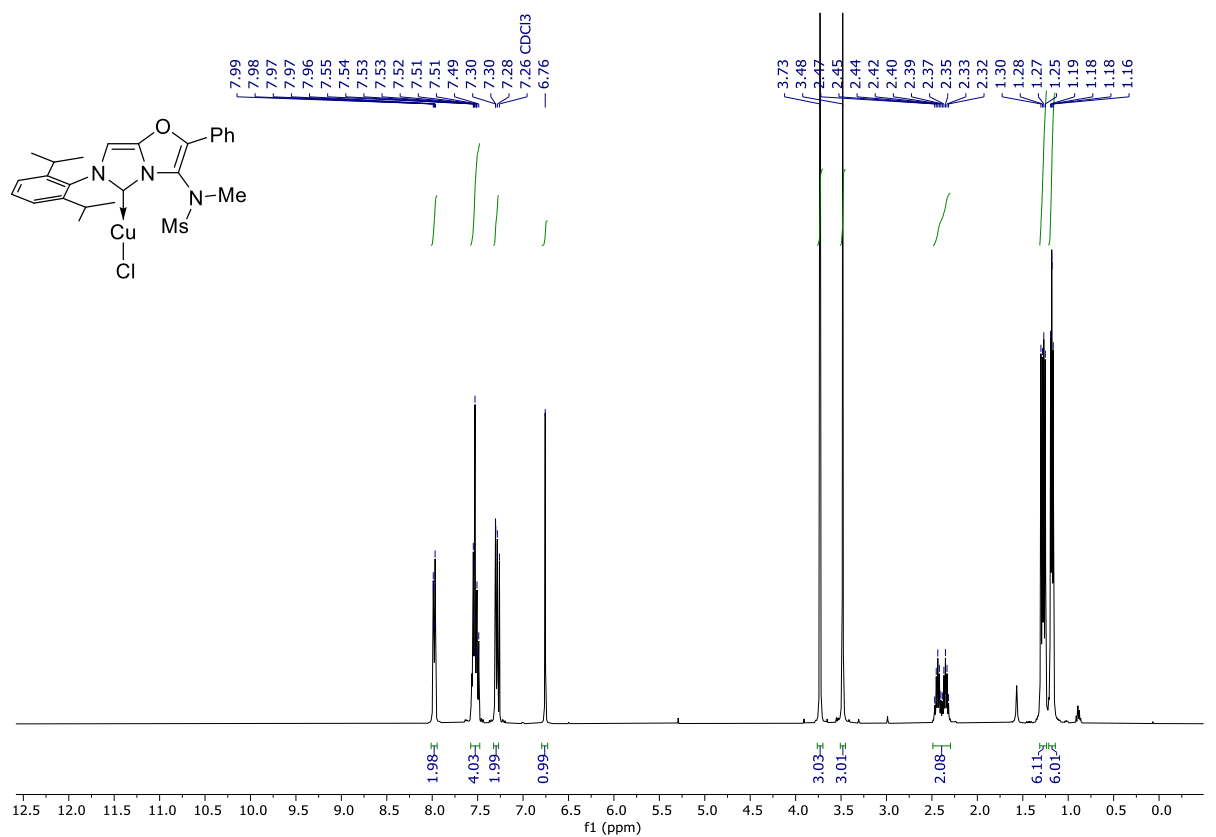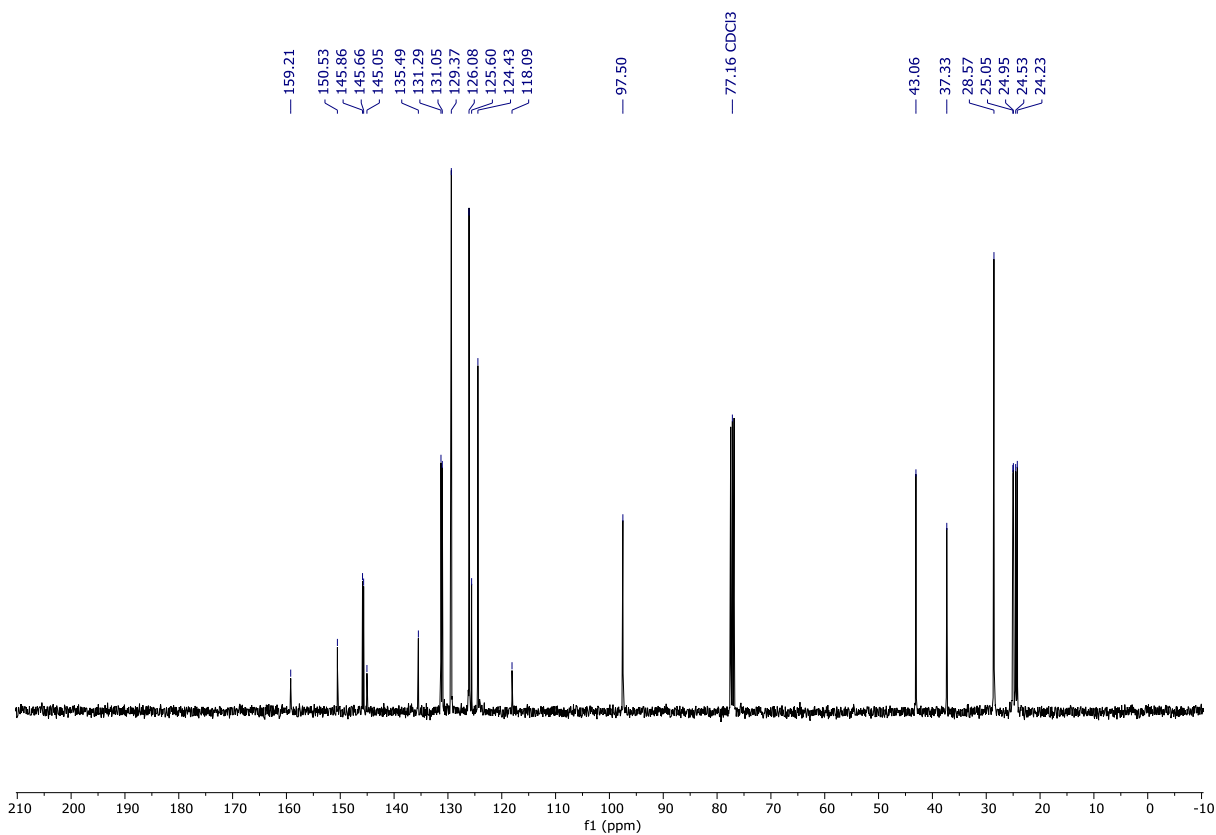

**(9a)Ir(CO)<sub>2</sub>Cl (15a) (Diastereomeric mixture) in CDCl<sub>3</sub> <sup>1</sup>H and <sup>13</sup>C UDEFT NMR**

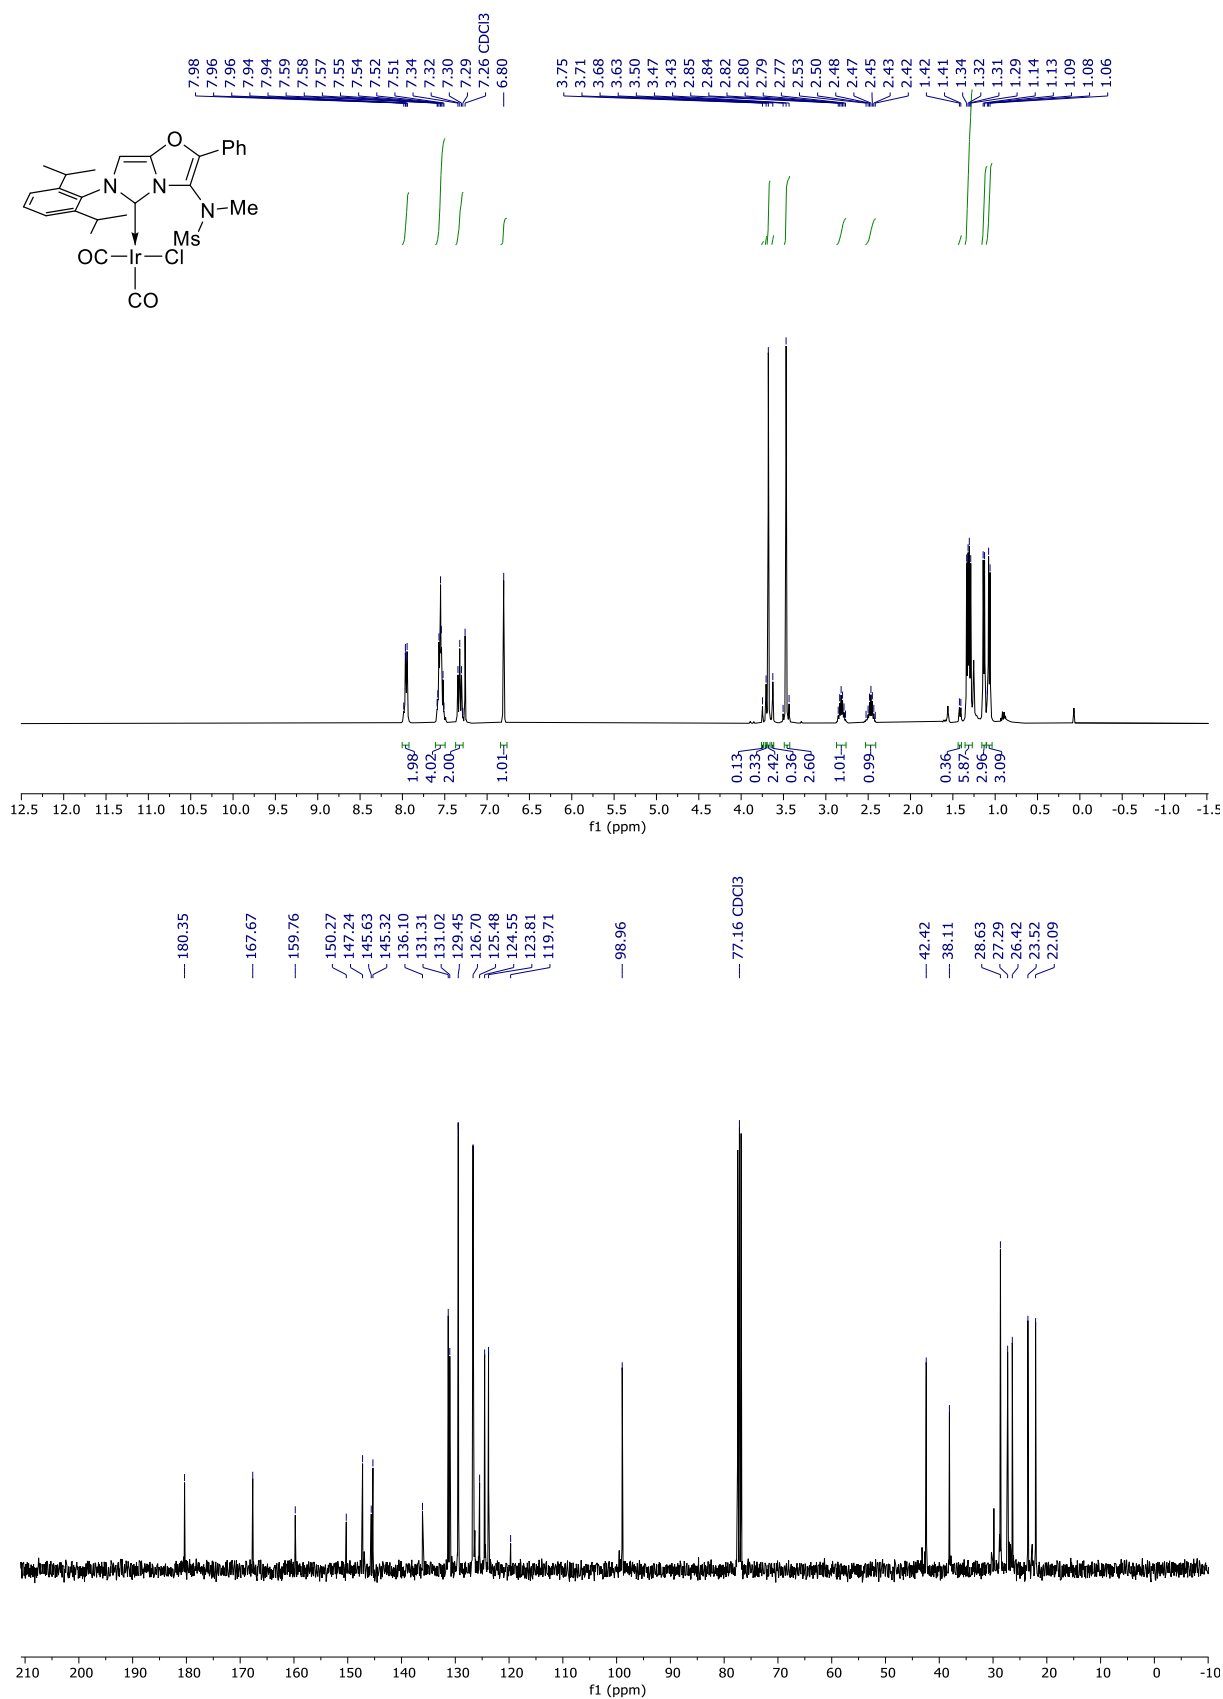

**(9b)Ir(CO)<sub>2</sub>Cl (15b) (Diastereomeric mixture) in CDCl<sub>3</sub> <sup>1</sup>H and <sup>13</sup>C UDEFT NMR**

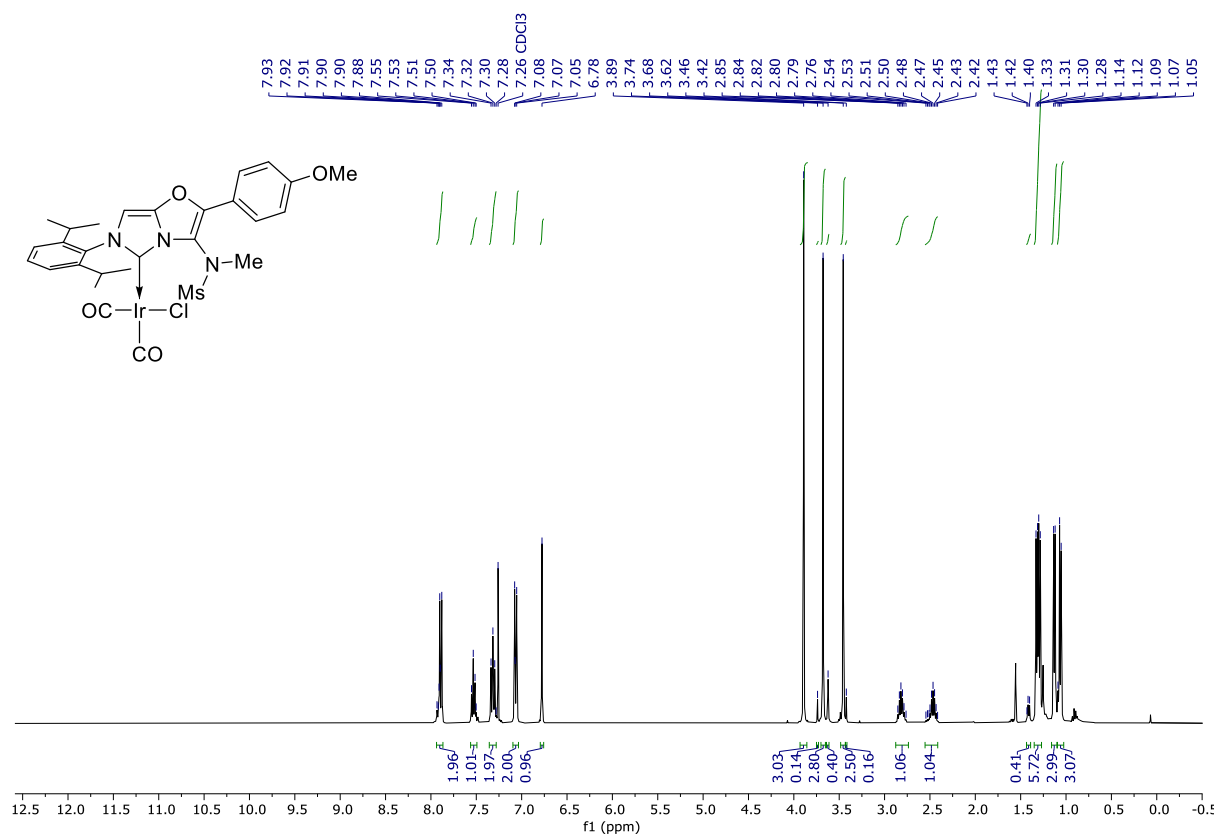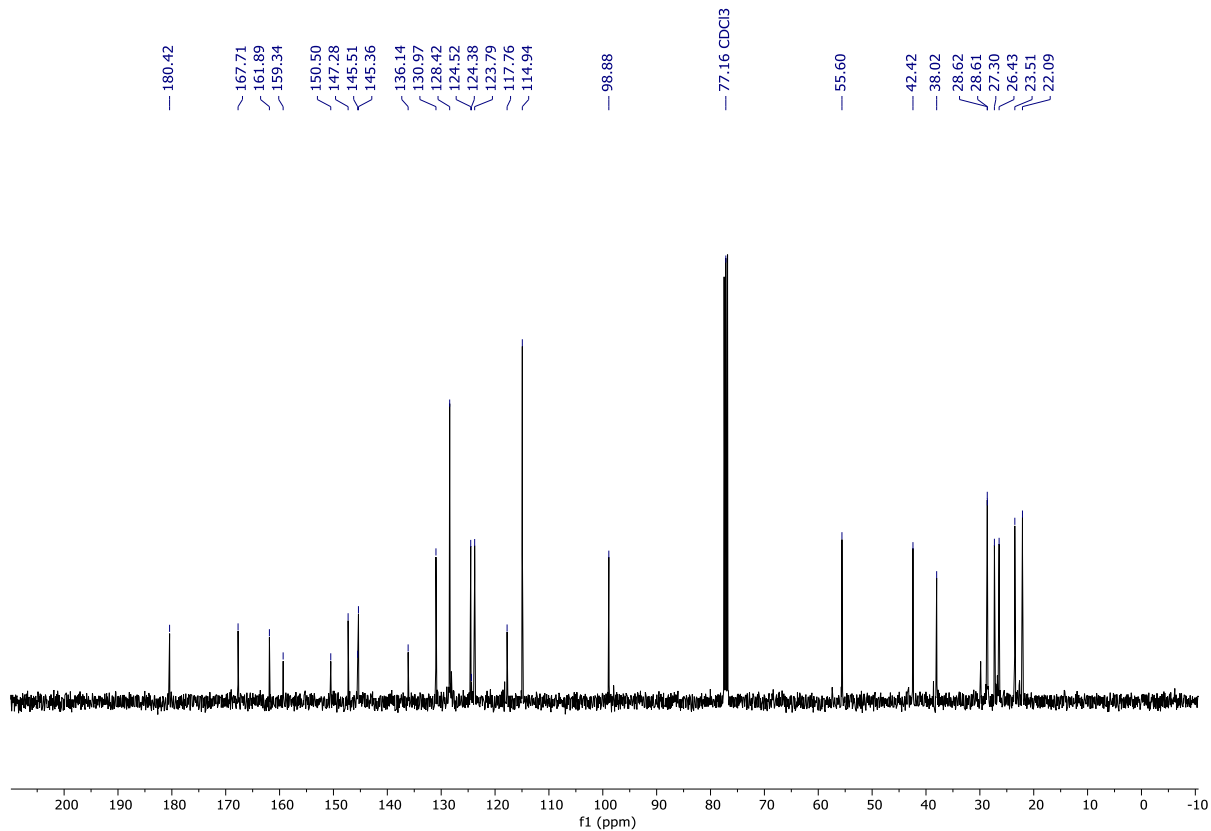

## Crystallographic data

The dataset for **13** was measured on an Agilent SuperNova diffractometer using an Atlas detector. The data collection was driven and processed and an absorption correction was applied using CrysAlisPro [22]. The dataset for **14** was measured by the UK National Crystallography Service on a Rigaku Saturn724+ diffractometer equipped with a rotating anode molybdenum source and a AFC12 goniometer. The data collection was driven and processed and an absorption correction was applied using CrystalClear-SM Expert 3.1 [23]. Both structures were solved using ShelXS [24] and refined by a full-matrix least-squares procedure on  $F^2$  in ShelXL [25]. Figures and reports were produced using OLEX2 [26]. All non-hydrogen atoms were refined with anisotropic displacement parameters. All hydrogen atoms in both structures and the deuterium atom in **14** were fixed as riding models and the isotropic thermal parameters ( $U_{iso}$ ) were based on the  $U_{eq}$  of the parent atoms.

Structure **14** contains a molecule of deuterated chloroform.

CCDC 2310256-2310257 contain the supplementary crystallographic data for this paper. These data can be obtained free of charge from The Cambridge Crystallographic Data Centre *via* [https://www.ccdc.cam.ac.uk/data\\_request/cif](https://www.ccdc.cam.ac.uk/data_request/cif).

Crystal data for **13**:  $C_{25}H_{29}AuClN_3O_3S$  ( $M = 683.99$  g/mol): monoclinic, space group  $P2_1/n$  (no. 14),  $a = 9.9647(3)$  Å,  $b = 20.0858(10)$  Å,  $c = 12.9728(4)$  Å,  $\beta = 100.759(3)^\circ$ ,  $V = 2550.85(16)$  Å<sup>3</sup>,  $Z = 4$ ,  $T = 100.00(10)$  K,  $\mu(\text{Mo K}\alpha) = 5.986$  mm<sup>-1</sup>,  $D_{\text{calc}} = 1.781$  g/cm<sup>3</sup>, 13660 reflections measured ( $4.628^\circ \leq 2\Theta \leq 52.738^\circ$ ), 5212 unique ( $R_{\text{int}} = 0.0310$ ,  $R_{\text{sigma}} = 0.0428$ ) which were used in all calculations. The final  $R_1$  was 0.0357 ( $I > 2\sigma(I)$ ) and  $wR_2$  was 0.0721 (all data).

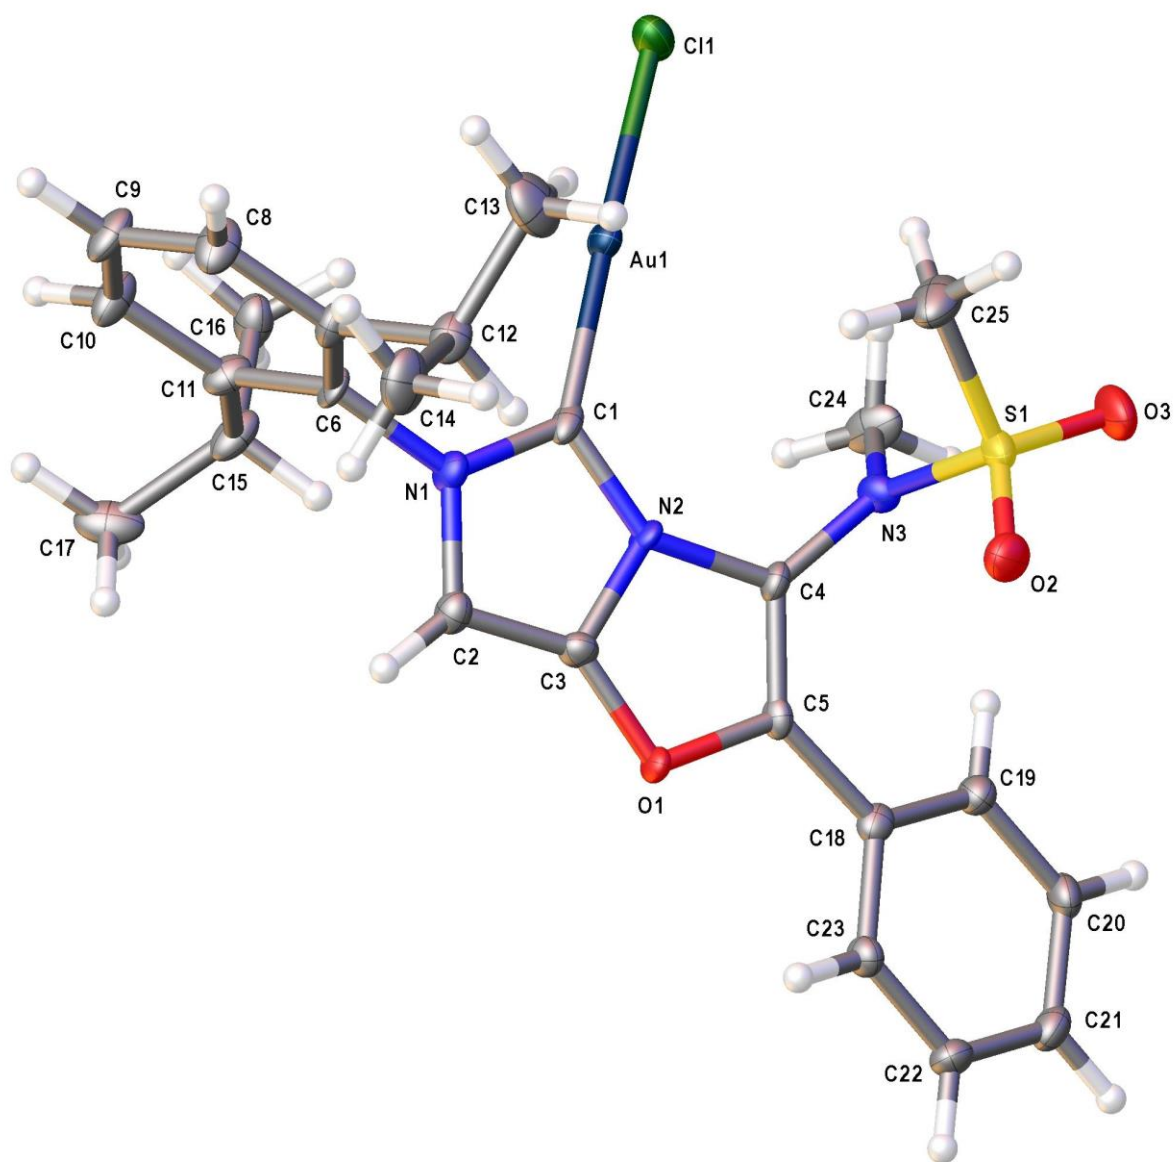

Figure S1 Crystal structure of **13** with ellipsoids drawn at the 50 % probability level.

Crystal data for **14**:  $C_{26}H_{29}DN_3O_3SCl_4Cu$  ( $M = 670.97$  g/mol): monoclinic, space group  $P2_1/n$  (no. 14),  $a = 16.9828(3)$  Å,  $b = 10.1478(2)$  Å,  $c = 17.4535(12)$  Å,  $\beta = 95.615(7)^\circ$ ,  $V = 2993.5(2)$  Å<sup>3</sup>,  $Z = 4$ ,  $T = 100(2)$  K,  $\mu(\text{MoK}\alpha) = 1.189$  mm<sup>-1</sup>,  $D_{\text{calc}} = 1.489$  g/cm<sup>3</sup>, 39227 reflections measured ( $6.174^\circ \leq 2\Theta \leq 54.96^\circ$ ), 6850 unique ( $R_{\text{int}} = 0.0259$ ,  $R_{\text{sigma}} = 0.0168$ ) which were used in all calculations. The final  $R_1$  was 0.0319 ( $I > 2\sigma(I)$ ) and  $wR_2$  was 0.0820 (all data).

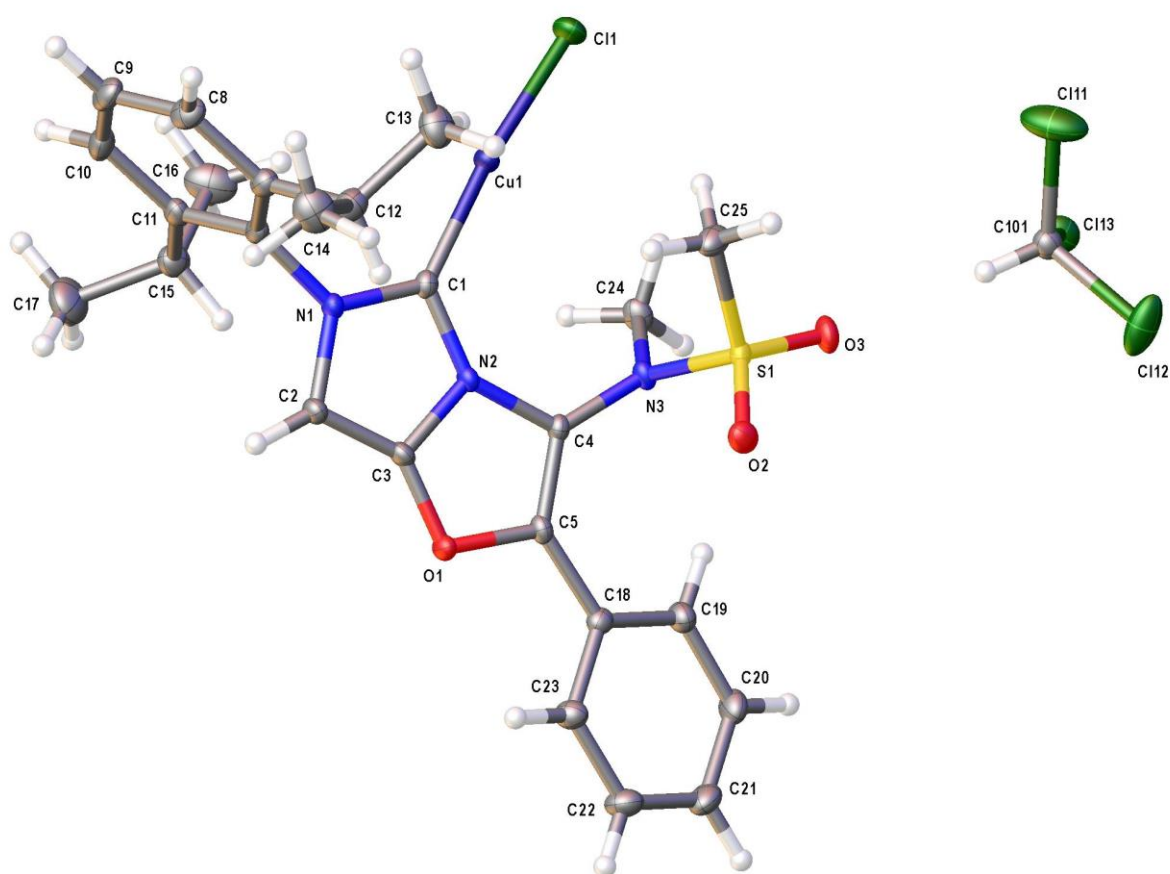

Figure S2 Crystal structure of **14** with ellipsoids drawn at the 50% probability level.

## References

1. Johnson, D. C.; Widlanski, T. S. *J. Org. Chem.* **2003**, *68*, 5300-5309.
2. Rao, M. L.; Jadhav, D. N.; Dasgupta, P. *Org. Lett.* **2010**, *12*, 2048-2051.
3. Araki, Y.; Kobayashi, K.; Yonemoto, M.; Kondo, Y. *Org. Biomol. Chem.* **2011**, *9*, 78-80.
4. Zhang, X.; Zhang, Y.; Huang, J.; Hsung, R. P.; Kurtz, K. C. M.; Oppenheimer, J.; Petersen, M. E.; Sagamanova, I. K.; Shen, L.; Tracey, M. R. *J. Org. Chem.* **2006**, *71*, 4170-4177.
5. Dateer, R. B.; Shaibu, B. S.; Liu, R.-S. *Angew. Chem., Int. Ed.* **2012**, *51*, 113-117.
6. Mukherjee, A.; Dateer, R. B.; Chaudhuri, R.; Bhunia, S.; Karad, S. N.; Liu, R.-S. *J. Am. Chem. Soc.* **2011**, *133*, 15372-15375.
7. Coste, A.; Karthikeyan, G.; Couty, F.; Evano, G. *Angew. Chem., Int. Ed.* **2009**, *48*, 4381-4385.
8. Xie, J.; Huang, Z.-Z. *Angew. Chem. Int. Ed.* **2010**, *49*, 10181-10185.
9. Cameron, A. G.; Hewson, A. T. *J. Chem. Soc., Perkin Trans. 1* **1983**, 2979-2982.
10. Alcarazo, M.; Roseblade, S. J.; Cowley, A. R.; Fernández, R.; Brown, J. M.; Lassaletta, J. M. *J. Am. Chem. Soc.* **2005**, *127*, 3290-3291.
11. Collado, A.; Gómez-Suárez, A.; Martin, A. R.; Slawin, A. M. Z.; Nolan, S. P. *Chem. Commun.* **2013**, *49*, 5541-5543.
12. Walkinshaw, A. J.; Xu, W.; Suero, M. G.; Gaunt, M. J. *J. Am. Chem. Soc.* **2013**, *135*, 12532-12535.
13. Cecchini, C.; Lanzi, M.; Cera, G.; Malacria, M.; Maestri, G. *Synthesis* **2019**, *51*, 1216-1224.
14. Nieto-Oberhuber, C.; López, S.; Echavarren, A. M. *J. Am. Chem. Soc.* **2005**, *127*, 6178-6179.
15. Martí, À.; Montesinos-Magraner, M.; Echavarren, A. M.; Franchino, A. *Eur. J. Org. Chem.* **2022**, *2022*, e202200518.
16. Marion, N.; Ramón, R. S.; Nolan, S. P. *J. Am. Chem. Soc.* **2009**, *131*, 448-449.
17. Zhao, C.; Jia, X.; Wang, X.; Gong, H. *J. Am. Chem. Soc.* **2014**, *136*, 17645-17651.
18. Hsieh, J.-C.; Chen, Y.-C.; Cheng, A.-Y.; Tseng, H.-C. *Org. Lett.* **2012**, *14*, 1282-1285.
19. Tang, Y.; Benaissa, I.; Huynh, M.; Vendier, L.; Lugan, N.; Bastin, S.; Belmont, P.; César, V.; Michelet, V. *Angew. Chem. Int. Ed.* **2019**, *58*, 7977-7981.
20. Vanitcha, A.; Damelin-court, C.; Gontard, G.; Vanthuyne, N.; Mouriès-Mansuy, V.; Fensterbank, L. *Chem. Commun.* **2016**, *52*, 6785-6788.
21. Aillard, P.; Dova, D.; Magné, V.; Retailleau, P.; Cauteruccio, S.; Licandro, E.; Voituriez, A.; Marinetti, A. *Chem. Commun.* **2016**, *52*, 10984-10987.
22. CrysAlisPro, Rigaku Oxford Diffraction, 2015
23. CrystalClear-SM Expert 3.1 b18, Rigaku Oxford Diffraction, 2012.
24. Sheldrick, G. *Acta. Cryst.* **2008**, *64*, 112-122.

25. Sheldrick, G. M. *Acta. Cryst.* **2015**, *C71*, 3-8.
26. Dolomanov, O. V.; Bourhis, L. J.; Gildea, R. J.; Howard, J. A. K.; Puschmann, H. J. *Appl. Crystallogr.* **2009**, *42*, 339-341.
